# Supplementary material for: PorA, a conserved C-terminal domain-containing protein, impacts the PorXY-SigP signaling of the type IX secretion system
Source: PubMed Central journal article supplement (PMC7712824; doi:10.1038/s41598-020-77987-y), 2020-12-03

**Supplementary Information for:**

**PorA, a conserved C-terminal domain-containing protein, impacts the PorXY-SigP signaling of the type IX secretion system**

Hideharu Yukitake<sup>1</sup>, Mikio Shoji<sup>1</sup>, Keiko Sato<sup>1</sup>, Yusuke Handa<sup>2</sup>, Mariko Naito<sup>1</sup>,  
Katsumi Imada<sup>2</sup>, Koji Nakayama<sup>1</sup>.

1. Department of Microbiology and Oral Infection, Graduate School of Biomedical Sciences, Nagasaki University, Nagasaki, Nagasaki 852-8588, Japan.
2. Department of Macromolecular Science, Graduate School of Science, Osaka University, Toyonaka, Osaka 560-0043, Japan

Correspondence and requests for materials should be addressed to M.S.

([m-shoji@nagasaki-u.ac.jp](mailto:m-shoji@nagasaki-u.ac.jp))

## Supporting Materials

**Fig. S1. Colony pigmentation of *P. gingivalis* mutant strains.** (A) Wild type,  $\Delta porA$ ,  $\Delta PGN\_0654$ , and  $\Delta PGN\_1770$  mutants were grown on the blood agar plate for 3 days. (B) Wild type,  $\Delta porA \Delta porY$ , and  $\Delta porA \Delta porY/porY(S266W)$  mutants were grown on the blood agar plate for 5 days. This pigmentation data is related to Figs. S5 and S6.

**Fig. S2. Presence of PorK, PorL, and PorM proteins in the  $\Delta porA$  mutant.** Cell lysates of *P. gingivalis*  $\Delta porA$ , *porK*, *porL*, and *porM* mutants were subjected to SDS-PAGE, followed by immunoblot analyses with  $\alpha$ -PorK,  $\alpha$ -PorL, and  $\alpha$ -PoM. Exposure time in the experiments in this figure was much longer than that in the experiments in Fig. 2B. Black, green, and red arrows indicate the PorK, PorL, and PorM proteins, respectively. CBB: Coomassie Brilliant Blue staining.

**Fig. S3. qRT-PCR analysis of the *porX* mRNA expression in the  $\Delta sigP$  mutant.** Expression of the *porX* gene in the wild type and the  $\Delta sigP$  mutant. RNA samples of the strains were subjected to qRT-PCR analysis. The mean expression of *porX* in the wild type was regarded as 1.

**Fig. S4. Plasmid-mediated complementation in the  $\Delta porA$ ,  $\Delta porY$ ,  $\Delta porX$ , and**

**$\Delta sigP$  mutants.** (A) Cell lysates of *P. gingivalis* wild type,  $\Delta porA$ ,  $\Delta porA/porA^+$ ,  $\Delta porY$ ,  $\Delta porY/porY^+$ ,  $\Delta porX$ ,  $\Delta porX/porX^+$ ,  $\Delta sigP$ , and  $\Delta sigP/sigP^+$  strains were subjected to SDS-PAGE, followed by immunoblot analysis with  $\alpha$ -PorY. Full-length blot of Fig. S4A is presented in Fig. S12. (B) Expression of the *porY* gene in the wild type,  $\Delta porA$ ,  $\Delta porA/porA^+$ ,  $\Delta porY$ ,  $\Delta porY/porY^+$ ,  $\Delta porX$ ,  $\Delta porX/porX^+$ ,  $\Delta sigP$ , and  $\Delta sigP/sigP^+$  strains. RNA samples of the strains were subjected to qRT-PCR analysis. The mean expression of *porY* in the wild type was regarded as 1.

**Fig. S5. Immunoblot analysis of the  $\Delta porA \Delta porY$  mutant and the  $\Delta porA$**

**$\Delta porY/porY(S266W)$  strain.** Cell lysates of *P. gingivalis* wild type,  $\Delta porA::cepA$ ,  $\Delta porY::ermF$ ,  $\Delta porA \Delta porY$ ,  $\Delta porA/porY(S266W)$ , and  $\Delta porA \Delta porY/porY(S266W)$  strains were subjected to SDS-PAGE, followed by immunoblot analysis with  $\alpha$ -PorA.  $\alpha$ -PorK,  $\alpha$ -PorX,  $\alpha$ -PorY, and  $\alpha$ -SigP. CBB: Coomassie Brilliant Blue staining. The PorK, PorX, PorY, and SigP proteins are indicated by black, red, blue, and green arrows.

**Fig. S6. Kgp and Rgp activities of the  $\Delta porA \Delta porY$  mutant and the  $\Delta porA$**

**$\Delta porY/porY(S266W)$  strain.**

Kgp and Rgp activities in whole cell cultures of *P. gingivalis* wild type,  $\Delta porA::ermF$ ,  $\Delta porA/porA^+$ ,  $\Delta porA::cepA$ ,  $\Delta porY::ermF$ ,  $\Delta porA \Delta porY$ ,  $\Delta porA/porY(S266W)$ , and  $\Delta porA \Delta porY/porY(S266W)$  strains were measured.

**Fig. S7. Dot blot and immunoblot analyses of various T9SS-related mutants. (A)**

Dot blot analyses of the wild type,  $\Delta porA$ ,  $porK$ ,  $\Delta porX$ ,  $\Delta porY$ , and  $\Delta sigP$  strains with  $\alpha$ -Hbp35 and  $\alpha$ -PorA. (B) Immunoblot analyses with  $\alpha$ -Hbp35 and  $\alpha$ -PorA.

**Fig. S8. Interaction between PorA and PorV. (A)** Immunoblot analysis with  $\alpha$ -PorA

and  $\alpha$ -PorV. The  $\alpha$ -PorA-immunoprecipitated proteins from the membrane fractions of *P. gingivalis* cells treated without DTBP were separated by SDS-PAGE, followed by immunoblot analyses using  $\alpha$ -PorA and  $\alpha$ -PorV. CBB: Coomassie Brilliant Blue staining. (B) The same samples as (A) were subjected to Native PAGE, followed by immunoblot analyses using  $\alpha$ -PorA and  $\alpha$ -PorV. CBB: Coomassie Brilliant Blue staining.

**Fig. S9. Interaction of PorV with CTDs of various T9SS cargo proteins. (A)**

Alignment of various CTDs used for Halo tag fusion proteins. The C-terminal ~80

amino acids of Hbp35, Kgp, Mfa5, PPAD, and RgpB were aligned using the ClustalW. '\*' indicates positions which have a single, fully conserved residue. '.' indicates that one of the following 'strong' groups is fully conserved. ':' indicates that one of the following 'weaker' groups is fully conserved. (B) Halo tag fusion proteins were purified by Halo tag resin, followed by immunoblot analyses with  $\alpha$ -PorV and  $\alpha$ -Halo tag. The black arrows indicate the PorV protein.

**Fig. S10. Expression of T9SS components in T9SS component-deficient mutants.**

(A) Expression of the *porK*, *porL*, *porM*, *porT*, *porV*, and *sov* genes in the wild type, *porK*, *porM*, *porT*, *porV*, and *sov* strains. RNA samples of the strains were subjected to qRT-PCR analysis. The mean expression of each gene in the wild type was regarded as 1. (B) Production of the PorK, PorM, and PorV proteins in the wild type, *porK*, *porM*, *porT*, *porV*, and *sov* strains. Cell lysates of the strains were subjected to SDS-PAGE, followed by immunoblot analyses with  $\alpha$ -PorK,  $\alpha$ -PorM, and  $\alpha$ -PorV. Full-length blot of Fig. S10B is presented in Fig. S13.

**Fig. S11. Full-length blots/gels of Figs. 1E and 1F are presented.**

**Fig. S12. Full-length blot of Fig. S4A is presented.**

**Fig. S13. Full-length blots of Fig. S10B are presented.**

**Table S1. Bacterial strains and plasmids used in this study.**

**Table S2. Primers used in this study.**

**Table S3. X-ray data collection and refinement statistics.**

## Supplemental Text

### Construction of *P. gingivalis* mutant strains

DNA regions upstream and downstream of the *porA*, PGN\_1770, and PGN\_0654 genes were PCR amplified from the chromosomal DNA of *P. gingivalis* ATCC 33277 using pairs of primers (PGN gene number-U-F plus PGN gene number-U-R and PGN gene number-D-F plus gene number -D-R), respectively, where *U* indicates upstream, *F* indicates forward, *D* indicates downstream, and *R* indicates reverse. Primers used in this study are listed in Supplemental Table S2. The amplified DNA upstream of each gene was double digested with KpnI plus a corresponding restriction enzyme (BamHI or BglII). The amplified DNA downstream of each gene was digested with NotI plus a corresponding restriction enzyme (BamHI or BglII). Both digested DNAs were inserted together into the KpnI-NotI site of pBluescript II SK(+) to yield pKD1301, pKD1308, and pKD1309. The 1.1-kb BamHI *ermF* DNA fragment was inserted into the BamHI or BglII site of the resulting plasmids to yield plasmids pKD1302, pKD1310, and pKD1311 for mutagenesis. The 1.17-kb BamHI *cepA* DNA fragment was inserted into the BglII site of the pKD1301 to yield plasmid pKD1303 for mutagenesis. The pKD1302 was digested with BssHII and the pKD1310, pKD1311, and pKD1303 were digested with KpnI plus NotI, and these linearized DNA fragments were introduced into

*P. gingivalis* ATCC 33277 by electroporation to generate Em<sup>r</sup> transformant (KDP1041, KDP1049, and KDP1050) or Ap<sup>r</sup> transformant (KDP1045).

To create a *kgp::cat rgpA::cepA rgpB::tetQ ΔporA::ermF* mutant (KDP1040), BssHII-digested pKD1302 was introduced into KDP981 (*kgp::cat rgpA::cepA rgpB::tetQ*) by electroporation followed by selection on blood agar plates containing Em (10 µg/ml).

To create a *porU::ermF ΔporR::tetQ* mutant (KDP1059), the pKD894 were linearized with NotI and introduced into *porU::ermF* (KDP360) by electroporation followed by selection on blood agar plates containing Tc (0.7 µg/ml).

### **Construction of a complemented strain of the *ΔporA* mutant**

The promoter region of *Porphyromonas gulae catalase* gene (accession no. AB083039 in GenBank/EMBL/DDBJ databases) was PCR amplified from *P. gulae* VPB3492 chromosomal DNA using the pair of primers PRO-U and PRO-R-B, digested with KpnI plus BamHI, and inserted into the KpnI-BamHI site of pBSSK to yield pKD1304. The entire *porA* gene containing its downstream region was PCR amplified from *P. gingivalis* ATCC 33277 chromosomal DNA using the pair of primers N0123-coF-B/N0123-coR-(NotI), the amplified DNA was cloned into the pGEM-T Easy vector



(Promega) to yield pKD1305. pKD1305 DNA was digested with BglIII plus NotI (restriction site within the pGEM-T Easy vector), and then ligated with the larger BamHI-NotI fragment of pKD1304 to construct pKD1306. The smaller KpnI-NotI fragment of pKD1306 was then ligated with the larger KpnI-NotI fragment of pTCB to construct pKD1307. After mating of *Escherichia coli* S17-1<sup>47</sup> containing pKD1307 with the *P. gingivalis*  $\Delta porA$  mutant KDP1041 or KDP1045, an Em<sup>r</sup> Tc<sup>r</sup> transconjugant (KDP1042) or an Ap<sup>r</sup> Tc<sup>r</sup> transconjugant (KDP1051) were obtained.

#### **Electrotransformation of pTIO-*tetQ*-*porY*(S266W) in the $\Delta porA$ mutant**

The entire *porY* containing its promoter was PCR-amplified from chromosomal DNA of a pseudo-revertant containing *porY*(S266W) of the  $\Delta porA$  mutant using the pair of primers porY-U-F-P and porY-D-R-N, digested with PstI plus NotI, and then inserted into the PstI-NotI site of the *E. coli*-*Bacteroides* shuttle vector plasmid pTIO-*tetQ* to yield pTIO-*tetQ*-*porY*(S266W). The plasmids pTIO-*tetQ* and pTIO-*tetQ*-*porY*(S266W) were introduced into the  $\Delta porA$  mutants KDP1041 and KDP1045 by electroporation, resulting in strains KDP1043 and KDP1044, and strains KDP1046 and KDP1047, respectively. To construct KDP1048, a 2.7-kb fragment containing the  $\Delta porX::ermF$  gene region was PCR amplified from the KDP363 chromosomal DNA using the pair of

primers N1019-U-F3/N1019-D-R2. Amplified DNA was introduced into KDP1047 by transformation, resulting in KDP1048.

### **Construction of $\Delta porA \Delta porY$ double mutant strains**

To construct  $\Delta porA::cepA \Delta porY::ermF$  mutant (KDP1060) and  $\Delta porA::cepA \Delta porY::ermF /pTIO-tetQ-p-porY(S266W)$  mutant (KDP1061), a 2.2-kb fragment containing the  $\Delta porY::ermF$  gene region was PCR amplified from the  $\Delta porY::ermF$  mutant (KDP364) chromosomal DNA using the pair of primers PGN2001-U-F-650/PGN2001-D-R-502. Amplified DNA was introduced into the  $\Delta porA::cepA$  mutant (KDP1045) and  $\Delta porA::cepA/pTIO-tetQ-p-porY(S266W)$  mutant (KDP1047) by electroporation, resulting in KDP1060 and KDP1061, respectively.

### **Dot blot analysis**

*P. gingivalis* cells that had fully grown in enriched BHI medium were harvested, washed once with PBS and suspended in PBS. The washed cells were adjusted to an OD<sub>595</sub> of 0.5. A 3  $\mu$ l aliquot of the adjusted cells was blotted directly onto a nylon membrane (Biodyne Plus) and left to dry.

### **Biotinylation of surface proteins of *P. gingivalis***

*P. gingivalis* cells that had fully grown in enriched BHI medium were harvested by centrifugation, washed once with ice-cold PBS, suspended in PBS containing 1 mg/ml biotinamidocaproate *N*-hydroxysuccinimide ester (Calbiochem-Novabiochem) and mixed gently for 30 min at 37 °C<sup>56</sup>. The labelled cells were washed twice with ice-cold PBS and lysed with 1% DDM (vol/vol) and then immunoprecipitated by the use of Protein G agarose beads with 5 µl of α-PorA polyclonal antibody. The immunoprecipitated samples were subjected to SDS-PAGE. Biotinylated proteins on the gel were transferred to a PVDF membrane and detected with peroxidase-conjugated streptavidin (Chemicon).

### **Immunoprecipitation with α-PorA antibody**

Cells were grown in BHI broth (200 ml) until late exponential phase (overnight culture). Cells were harvested by centrifugation at 10,000 × g for 20 min and washed with HEPES buffer (10 mM HEPES, pH 8.0, 0.15 M NaCl) two times and concentrated eight-fold by suspension in 25 ml of 10 mM HEPES pH8.0. Cells were cross-linked using 0.25 mM dimethyl 3,3'-dithiobispropionimidate (DTBP) (easily reversed with dithiothreitol (DTT)) for 1 h at room temperature. The reactions were quenched for 10

min with 1.25 ml (50 mM final concentration) of 1 M Tris-HCl (pH 8.0). Cells were centrifuged at  $10,000 \times g$  for 10 min and suspended in 20 ml of Buffer A (10 mM HEPES pH 8.0 with 1 mM TLCK, 1 mM Leupeptin) and then mixed with 25  $\mu\text{g/ml}$  DNase I and 25  $\mu\text{g/ml}$  RNase A. After gentle shaking for 15 min at 4 °C, the suspension was disrupted by three passes at 100 MPa in a French pressure cell press. Remaining intact bacteria cells were removed by centrifugation at  $2,400 \times g$  for 10 min. Supernatant was centrifuged at  $100,000 \times g$  for 60 min at 4 °C. The pellets were suspended in Buffer A and then mixed with 1% DDM (vol/vol). After gentle shaking for 30 min at RT, the suspension was centrifuged at  $8,000 \times g$  for 10 min at RT. The supernatant was stored at 4 °C as the membrane fraction. The membrane fraction was immunoprecipitated by use of Protein G agarose beads with 5  $\mu\text{l}$  of  $\alpha$ -PorA polyclonal antibody. Before the immunoprecipitation analysis, the  $\alpha$ -PorA polyclonal antibody was cross-linked to the Protein G beads by dimethyl pimelimidate dihydrochloride to prevent co-elution of the antibody with the target protein. In Figs. 4A and S8A, the resulting precipitate was dissolved with the same volume of the sample buffer and loaded on an SDS (12%) gel. In Fig. S8B, the resulting precipitate was dissolved with the elution buffer (0.1 M glycine-HCl, pH 2.7), and then supplemented with

neutralization buffer (1 M Tris-HCl, pH 9.0) and loaded on a Native gel. Immunoblot analysis was performed with  $\alpha$ -PorA and  $\alpha$ -PorV.

### **Hemagglutinating activity**

Overnight cultures of *P. gingivalis* strains grown in enriched BHI medium were centrifuged, washed once with PBS, and suspended in PBS at an optical density of 0.5 at 595 nm. The bacterial suspensions were then diluted in a twofold series with PBS. A 100- $\mu$ l aliquot of each suspension was mixed with an equal volume of defibrinated sheep erythrocyte suspension (1% in PBS) and incubated in a round-bottom microtiter plate at room temperature (RT) for 3 h.

### **Enzymatic assay**

When we measured Kgp and Rgp activities in cells or in culture supernatants in Figs. 1C and 2D, cultures of *P. gingivalis* strains at OD<sub>600</sub> of 1.0 were centrifuged to separate the culture supernatants and cells. Precipitated cells were resuspended with an original volume of phosphate-buffered saline (PBS). Each volume (2  $\mu$ l for Kgp and 5  $\mu$ l for Rgp) of bacterial cell suspensions and of culture supernatants were added to the reaction mixture (1.0 ml) containing 5 mM cysteine, 20 mM sodium phosphate buffer, pH 7.5, and 10 mM benzyloxycarbonyl-L-histidyl-L-glutamyl-L-lysine 4-methylcoumaryl-7-amide (Peptide Institute, Osaka, Japan) (for Kgp) or benzyloxycarbonyl-L-phenylalanyl-

L-arginine 4-methylcoumaryl-7-amide (Peptide Institute) (for Rgp). After 10 min incubation at 40 °C, the reaction was terminated by adding 100 mM sodium acetate buffer, pH 5.0, containing 10 mM iodoacetic acid (1.0 ml). The released 7-amino-4-methyl-coumarine was measured at 465 nm (excitation at 365 nm) by fluorescence spectrophotometer Beckman Coulter DTX 800 (Brea, CA). Enzymatic activities are expressed as  $\Delta E/\text{min}/\mu\text{l}$ . Whole cell cultures without separation to cells and culture supernatants were used in the experiments shown in Fig. S6.

### **Preparation of the outer membrane vesicle fraction**

*P. gingivalis* strains were mono- or co-cultured in 60 ml of enriched BHI medium at 37 °C for 48 h. *P. gingivalis* cells were harvested by centrifugation at  $6,000 \times g$  for 20 min at 4 °C. The supernatants were ultracentrifuged at  $100,000 \times g$  for 60 min at 4 °C. The pellets were washed once with PBS, and then dissolved in PBS containing 0.1 mM TLCK and 0.1 mM Leupeptin.

### **MS analysis**

A gel plug containing proteins was subjected to the following procedures: washing with 50% (v/v) acetonitrile, washing with 100% acetonitrile, reduction with 10 mM DTT, alkylation with 55 mM iodoacetamide, washing/dehydration with 50% (v/v) acetonitrile, and digestion for 10 h with 10  $\mu\text{g}/\text{ml}$  trypsin. The resulting peptides were

extracted from the gel plug with 0.1% (v/v) trifluoroacetic acid/50% (v/v) acetonitrile. Digests were spotted on a MALDI target using  $\alpha$ -cyano-4-hydroxycinnamic acid as a matrix. Spectra were acquired on a 4800 MALDI TOF/TOF analyzer (Applied Biosystems). Data analysis and MS database searching were performed using GPS Explorer<sup>TM</sup> and MASCOT software.

### **qRT-PCR analysis**

Total RNA was isolated from *P. gingivalis* cells grown to mid-exponential phase (OD<sub>600</sub> of ~1.0) by using a TRIzol reagent (Invitrogen, Carlsbad, CA, USA) and RNeasy Mini Kit (Qiagen Science). DNA was removed with RNase-Free DNase. cDNA was generated with SuperScript<sup>®</sup> VILO cDNA Synthesis Kit (Invitrogen). Real-time quantitative PCR (qRT-PCR) was performed using Brilliant III Ultra-Fast SYBR Green qRT-PCR Master Mix (Agilent Technologies, Santa Clara, CA) with the Mx3005P<sup>TM</sup> Real-Time PCR System (Agilent Technologies) according to the manufacturer's instruction. Primers for qRT-PCR were designed using Primer3 program and are listed in Table S2. qRT-PCR conditions were as follows: 1 cycle at 95 °C for 10 min, and 35 cycles of 95 °C for 30 s, and 60 °C for 1 min. At each cycle, accumulation of PCR products was detected by the reporter dye from the dsDNA-binding SYBR Green. To

confirm that a single PCR product was amplified, after the PCR, a dissociation curve (melting curve) was constructed in the range of 55 °C to 95 °C. All data were analyzed using Mx3005P software. The expression level of each targeted gene was normalized to that of the 16S rRNA gene, which was used as a reference. All PCR reactions were carried out in triplicate. The efficiency of primers binding was determined by linear regression by plotting the cycle threshold ( $C_T$ ) value versus the log of the cDNA dilution. Relative quantification of transcript was determined using the comparative  $C_T$  method ( $2^{-\Delta\Delta C_T}$ ) calibrated to 16S rRNA. qRT-PCR experiments were performed multiple times independently with comparable results.

### **Construction of Halo-CTD chimera proteins**

The signal sequence region coding for amino acids (M1-A19) of the *kgp* gene containing its promoter region was PCR amplified from *P. gingivalis* ATCC 33277 chromosomal DNA using the pair of primers *kgp*-U400-F-KpnI/*kgp*-sigR-SalI, digested with KpnI plus SalI, and inserted into the KpnI-SalI site of pBSSK to yield pKD1312.

The entire HaloTag gene region was PCR amplified from pFC15A containing Halo-tag (Promega) using the pair of primers Halo-F-SalI/ Halo-stopR-BglIII or Halo-R-BglIII.

The amplified DNAs were cloned into the pGEM-T Easy vector (Promega) to yield



pKD1313 and pKD1314. The sequence region coding for CTD of each T9SS cargo protein was PCR amplified from *P. gingivalis* ATCC 33277 chromosomal DNA using the pair of primers porA-CTD84-F-BglIII/porA-CTD-R-NotI, rgpB-CTD73-F-BglIII/rgpB-CTD-R-NotI, ppad-CTD84-F-BglIII/ppad-CTD-R-NotI, mfa5-CTD84-F-BglIII/mfa5-CTD-R-NotI, hbp35-CTD67-F-BglIII/hbp35-CTD-R-NotI, kgp-CTD72-F-BglIII/kgp-CTD-R-NotI. The each amplified DNA was cloned into the pGEM-T Easy vector (Promega) to yield pKD1315, pKD1316, pKD1317, pKD1318, pKD1319, and pKD1320. The above plasmid was digested with BglIII plus NotI, and then ligated with the larger BglIII-NotI fragment of pKD1314 to construct pKD1321, pKD1322, pKD1323, pKD1324, pKD1325 and pKD1326. The smaller SalI-NotI fragments of these plasmids were then ligated with the larger SalI-NotI fragment of pKD1312 to construct pKD1327, pKD1328, pKD1329, pKD1330, pKD1331, and pKD1332, respectively. The smaller SalI plus NotI (restriction site within the pGEM-T Easy vector) fragment of pKD1313 plasmid was then ligated with the larger SalI-NotI fragment of pKD1312 to construct pKD1333. The smaller KpnI-NotI fragments of pKD1327, pKD1328, pKD1329, pKD1330, pKD1331, pKD1332, and pKD1333 were then ligated with the KpnI-NotI site of pTCB plasmid to construct pKD1334, pKD1335, pKD1336, pKD1337, pKD1338, pKD1339, and pKD1340, respectively. After mating

of *Escherichia coli* S17-1<sup>47</sup> containing each pKD1334, pKD1335, pKD1336, pKD1337, pKD1338, pKD1339, and pKD1340 with the *P. gingivalis* *porN* mutant KDP358, Em<sup>r</sup>, Tc<sup>r</sup> transconjugants (KDP1052, KDP1053, KDP1054, KDP1055, KDP1056, KDP1057, and KDP1058) were obtained, respectively.

### **Isolation of Halo-CTD chimera protein fraction with DTBP-mediated crosslinking from partially purified samples**

Isolation of Halo-CTD(PorA) chimera protein fraction with DTBP-mediated crosslinking was performed as described previously<sup>59</sup>. Partially purified samples (PP) were prepared as follows. Cells were grown in BHI broth (200 ml) until late exponential phase (overnight culture). Cells were harvested by centrifugation at 10,000 × *g* for 20 min and washed twice with HEPES buffer (10 mM HEPES pH 8.0, 0.15 M NaCl) and concentrated eight-folds by suspension in 25 ml of HEPES buffer. Samples were cross-linked using 0.25 mM DTBP (easily reversed with DTT) for 1 h at room temperature. The reactions were quenched for 10 min with 1.25 ml (final 50 mM) of 1 M Tris-HCl (pH 8.0). Samples were centrifuged at 10,000 × *g* for 10 min and suspended in 40 ml ice-cold solution (step-1: 30 mM Tris-HCl pH 7.4, protease inhibitor cocktail (PIC): 1 mM TLCK, 1 mM EDTA pH 8.0, 500 mM sucrose) and incubated for 10 min on ice.

Samples were centrifuged at  $8,000 \times g$ ,  $4\text{ }^{\circ}\text{C}$  for 25 min. Pellets were resuspended in 40 ml ice-cold solution (step-2: 5 mM  $\text{MgCl}_2$ , PIC) and gently mixing for 10 min. Samples were centrifuged at  $8,000 \times g$ ,  $4\text{ }^{\circ}\text{C}$  for 25 min and resulting supernatants were concentrated by Amicon Ultra-15, 10K (Merck KGaA). One ml of concentrated supernatants was mixed with 12.5  $\mu\text{l}$  of settled HaloLink Resin and incubated for 1 h at room temperature. After centrifugation at  $4\text{ }^{\circ}\text{C}$  for 5 min, the supernatants were removed and the resin was washed three times with 1 ml of HaloTag purification buffer (1 $\times$ TBS [prepared from 10 $\times$ TBS; 1 M Tris, 1.5 M NaCl, pH 7.6] and 0.05% IGEPAL-CA630). After centrifugation, the resin was dissolved with 50  $\mu\text{l}$  of 2 $\times$ SDS sample buffer containing DTT and heat denatured at  $85\text{ }^{\circ}\text{C}$  for 3 min.

### **Purification of PorA-N**

His-PorA (Q28-K246) was expressed and purified with Ni-NTA affinity chromatography as described above. The His-tag and CTD of His-PorA (Q28-K246) were removed by the addition of trypsin (Sigma) for 1 h at  $27\text{ }^{\circ}\text{C}$ , and the reaction was terminated by addition of TLCK. The reactant was dialyzed against 10 mM Tris-HCl pH 8.0 at  $4\text{ }^{\circ}\text{C}$  overnight and loaded onto an anion exchange column (a HiTrap HP column (GE Healthcare)). Proteins were eluted with a linear gradient of NaCl (0-300

mM) and peak fractions containing PorA-N were further purified by size exclusion chromatography with a High Load 26/60 Superdex 200 column. The peak fractions were concentrated by ultrafiltration to 15.0 mg/ml, using an Amicon Ultra device (Merck Millipore), and used for crystallization.

### **Purification of His-PorA (Q28-K246)**

*E. coli* BL21 (DE3) (Novagen) cells carrying pET15b-PorA (Q28-K246) were grown in LB medium (1 % (w/v) Bacto tryptone, 0.5 % (w/v) yeast extract, 0.5 % (w/v) NaCl) containing 50 µg/ml Ap at 30 °C until the cell density had reached an OD<sub>660</sub> of around 0.5. Isopropyl β-d-1-thiogalactopyranoside (IPTG) was added to a final concentration of 0.2 mM to induce protein expression, and the culture was continued for 18 h at 18 °C. Cells were harvested by centrifugation and suspended in Buffer A (50 mM Tris-HCl (pH 8.0), 500 mM NaCl) containing protease inhibitor cocktail (Sigma). The cells were disrupted by sonication, and the soluble fraction isolated by ultracentrifugation was loaded onto a Ni-NTA affinity column (a HisTrap column (GE healthcare)). Proteins were eluted with a linear gradient of imidazole (0-350 mM). Peak fractions containing His-PorA (Q28-K246) were corrected and further purified with a High Load 26/60 Superdex 200 column (GE healthcare).

### **Purification of Se-Met PorA-N**

*E. coli* BL21 (DE3) cells carrying pET15b-PorA (Q28-K246) were inoculated in LB medium containing 50 µg/ml Ap at 30 °C for 20 h. Cells were harvested by centrifugation, washed and suspended in sterilized 100 ml of 0.9% NaCl solution. The cell suspension was mixed with 400 ml of Se-Met medium (1 g/l NH<sub>4</sub>Cl, 3 g/l KH<sub>2</sub>PO<sub>4</sub>, 7.7 g/l Na<sub>2</sub>HPO<sub>4</sub>, 20 g/l glucose, 0.3 g/l MgSO<sub>4</sub>, 10 mg/l Fe<sub>2</sub>(SO<sub>4</sub>)<sub>3</sub>, 10 mg/l thiamine, 50 mg/l L-selenomethionine) containing 50 µg/ml Ap and cultured at 30 °C until the cell density had reached an OD<sub>660</sub> of around 0.5. Then IPTG was added to a final concentration of 0.2 mM, and the culture was continued for 18 h at 30 °C. Se-Met PorA-N was purified in the same way as native PorA-N.

### **Crystallization**

Initial screening was performed using the sitting-drop vapor-diffusion technique with commercially available screening kits Wizard I and II, Cryo I and II (Emerald BioSystems) and Crystal Screen I and II (Hampton Research) at 293 K. Each drop was prepared by mixing 0.5 µl of protein solution (12 or 15 mg/ml, 10 mM Tris pH 8.0, 0.1 M NaCl) with 0.5 µl of reservoir solution and equilibrated to 70 µl of reservoir solution.

The best crystals were obtained from the drop prepared by mixing 0.5  $\mu$ l of 12 mg/ml protein solution with 0.5  $\mu$ l of reservoir solution containing 26% PEG8000 and 0.1 M  $(\text{NH}_4)_2\text{SO}_4$  at 293 K. Rod crystals grew to typical dimensions of 0.1 x 0.1 x 0.3 mm.

The space group of the crystals was *C2* with unit cell dimensions  $a = 67.3$ ,  $b = 43.2$ ,  $c = 48.6$  Å and  $\beta = 108.5^\circ$ . Se-Met derivative crystals were grown in similar condition (0.5  $\mu$ l of 18 mg/ml protein solution with 0.5  $\mu$ l of reservoir solution containing 22% PEG8000 and 0.1 M  $(\text{NH}_4)_2\text{SO}_4$  at 293 K) as the native crystals. The crystals belong to the space group of *C2* with unit cell dimensions  $a = 67.6$ ,  $b = 43.3$ ,  $c = 48.8$  Å and  $\beta = 108.7^\circ$ .

### **Data collection and structure determination**

X-ray diffraction data were collected at beamlines BL41XU in SPring-8 (Harima, Japan) with the approval of the Japan Synchrotron Radiation Research Institute (JASRI) (Proposal No.2014B1478, 2016A2539 and 2016B2539). Crystals were soaked in a cryo-protectant solution containing 10% (v/v) 2-methyl-2,4-pentanediol and 90% (v/v) of the reservoir solution for several seconds and were immediately transferred into liquid nitrogen for freezing. The diffraction data were measured under nitrogen gas flow at 100K. The anomalous diffraction data of the Se-Met crystals were collected at the

wavelength of 0.979 Å. The statistics of the diffraction data are summarized in Table S3. The diffraction data were processed with MOSFLM<sup>61</sup> and were scaled with Aimless<sup>62</sup>. The experimental phase was calculated using the SAD data of the Se-Met derivative and the initial model was automatically constructed using the program Phenix<sup>63</sup>. The atomic model was manually modified with Coot<sup>64</sup> and refined to 1.3 Å with Phenix against the native crystal data that showed the best resolution limit. The final refinement R factor and the free R factor were converged to 17.8% and 19.7%, respectively. The Ramachandran plot indicated that 99.3% and 0.7% residues were in the most favored and allowed region, respectively. Structural refinement statistics are summarized in Supplemental Table S3.

### **Ethics statement**

Animal care and experimental procedures were performed in accordance with the Guidelines for Animal Experimentation of Nagasaki University with approval from the Institutional Animal Care and Use Committee (approval number 1205010983).

**Supplemental Table S1. Bacterial strains and plasmids used in this study.**

| Strain or plasmid           | Description                                                                                                                            | Reference or source |
|-----------------------------|----------------------------------------------------------------------------------------------------------------------------------------|---------------------|
| <i>E. coli</i> strain       |                                                                                                                                        |                     |
| XL-1 blue                   | Host strain for general cloning                                                                                                        | Stratagene          |
| BL21(DE3)                   | Host strain for expression vectors                                                                                                     | Nippongene          |
| S17-1                       | RP4-2-Tc::Mu <i>aph</i> ::Tn7 <i>recA</i> , Sm <sup>r</sup>                                                                            | (47)                |
| <i>P. gingivalis</i> strain |                                                                                                                                        |                     |
| ATCC 33277                  | Wild type                                                                                                                              |                     |
| KDP117                      | <i>porT1::kan ermF</i> , Em <sup>r</sup>                                                                                               | (4)                 |
| KDP220                      | <i>wbpB::ermF</i> , Em <sup>r</sup>                                                                                                    | (33)                |
| KDP221                      | $\Delta$ <i>porR::tetQ</i> , Tc <sup>r</sup>                                                                                           | (33)                |
| KDP355                      | <i>porK::ermF</i> , Em <sup>r</sup>                                                                                                    | (5)                 |
| KDP357                      | <i>porM::ermF</i> , Em <sup>r</sup>                                                                                                    | (5)                 |
| KDP358                      | <i>porN::ermF</i> , Em <sup>r</sup>                                                                                                    | (5)                 |
| KDP360                      | <i>porU::ermF</i> , Em <sup>r</sup>                                                                                                    | (5)                 |
| KDP361                      | <i>porV::ermF</i> , Em <sup>r</sup>                                                                                                    | (15)                |
| KDP363                      | $\Delta$ <i>porX::ermF</i> , Em <sup>r</sup>                                                                                           | (5)                 |
| KDP364                      | $\Delta$ <i>porY::ermF</i> , Em <sup>r</sup>                                                                                           | (5)                 |
| KDP365                      | <i>sov::ermF</i> , Em <sup>r</sup>                                                                                                     | (5)                 |
| KDP372                      | $\Delta$ <i>porX::ermF fimA::[porX<sup>+</sup> tetQ]</i> , Em <sup>r</sup> Tc <sup>r</sup>                                             | (5)                 |
| KDP380                      | $\Delta$ <i>porY::ermF fimA::[porY<sup>+</sup> tetQ]</i> , Em <sup>r</sup> Tc <sup>r</sup>                                             | (5)                 |
| KDP391                      | $\Delta$ <i>sigP::ermF</i> , Em <sup>r</sup>                                                                                           | (29)                |
| KDP393                      | $\Delta$ <i>sigP::ermF/pTCB-promoter-sigP<sup>+</sup>-myc-terminator</i> , Em <sup>r</sup> Tc <sup>r</sup>                             | (29)                |
| KDP981                      | <i>kgp::cat rgpA2::cep rgpB2::tetQ</i> , Cm <sup>r</sup> Ap <sup>r</sup> Tc <sup>r</sup>                                               | (48)                |
| KDP982                      | <i>kgp::cat rgpA2::cep rgpB2::tetQ porK::ermF</i> , Cm <sup>r</sup> Ap <sup>r</sup> Tc <sup>r</sup> Em <sup>r</sup>                    | (48)                |
| KDP1040                     | <i>kgp::cat rgpA2::cep rgpB2::tetQ <math>\Delta</math>porA::ermF</i> , Cm <sup>r</sup> Ap <sup>r</sup> Tc <sup>r</sup> Em <sup>r</sup> | This study          |
| KDP1041                     | $\Delta$ <i>porA::ermF</i> , Em <sup>r</sup>                                                                                           | This study          |
| KDP1042                     | $\Delta$ <i>porA::ermF/pTCB-porA<sup>+</sup></i> , Em <sup>r</sup> Tc <sup>r</sup>                                                     | This study          |



|                      |                                                                                                          |            |
|----------------------|----------------------------------------------------------------------------------------------------------|------------|
| KDP1043              | <i>ΔporA::ermF/pTIO-tetQ</i> , Em <sup>r</sup> Tc <sup>r</sup>                                           | This study |
| KDP1044              | <i>ΔporA::ermF/pTIO-tetQ-p-porY(S266W)</i> , Em <sup>r</sup> Tc <sup>r</sup>                             | This study |
| KDP1045              | <i>ΔporA::cepA</i> , Ap <sup>r</sup>                                                                     | This study |
| KDP1046              | <i>ΔporA::cepA/pTIO-tetQ</i> , Ap <sup>r</sup> Tc <sup>r</sup>                                           | This study |
| KDP1047              | <i>ΔporA::cepA/pTIO-tetQ-p-porY(S266W)</i> , Ap <sup>r</sup> Tc <sup>r</sup>                             | This study |
| KDP1048              | KDP1047 <i>ΔporX::ermF</i> , Ap <sup>r</sup> Tc <sup>r</sup> Em <sup>r</sup>                             | This study |
| KDP1049              | <i>ΔPGN_1770::ermF</i> , Em <sup>r</sup>                                                                 | This study |
| KDP1050              | <i>ΔPGN_0654::ermF</i> , Em <sup>r</sup>                                                                 | This study |
| KDP1051              | <i>ΔporA::cepA/pTCB-porA<sup>+</sup></i> , Ap <sup>r</sup> Tc <sup>r</sup>                               | This study |
| KDP1052              | <i>porN::ermF/pTCB-p-ss(kgp)-halo-porA</i> CTD (D163-K246), Em <sup>r</sup> Tc <sup>r</sup>              | This study |
| KDP1053              | <i>porN::ermF/pTCB-p-ss(kgp)-halo-rgpB</i> CTD (S664-K736), Em <sup>r</sup> Tc <sup>r</sup>              | This study |
| KDP1054              | <i>porN::ermF/pTCB-p-ss(kgp)-halo-pad</i> CTD (G473-K556), Em <sup>r</sup> Tc <sup>r</sup>               | This study |
| KDP1055              | <i>porN::ermF/pTCB-p-ss(kgp)-halo-mfa5</i> CTD (Y1145-N1228), Em <sup>r</sup> Tc <sup>r</sup>            | This study |
| KDP1056              | <i>porN::ermF/pTCB-p-ss(kgp)-halo-hbp35</i> CTD (A278-P344), Em <sup>r</sup> Tc <sup>r</sup>             | This study |
| KDP1057              | <i>porN::ermF/pTCB-p-ss(kgp)-halo-kgp</i> CTD (G1452-K1723), Em <sup>r</sup> Tc <sup>r</sup>             | This study |
| KDP1058              | <i>porN::ermF/pTCB-p-ss(kgp)-halo stop</i> , Em <sup>r</sup> Tc <sup>r</sup>                             | This study |
| KDP1059              | <i>porU::ermF ΔporR::tetQ</i> , Em <sup>r</sup> Tc <sup>r</sup>                                          | This study |
| KDP1060              | <i>ΔporA::cepA ΔporY::ermF</i> , Ap <sup>r</sup> Em <sup>r</sup>                                         | This study |
| KDP1061              | <i>ΔporA::cepA ΔporY::ermF/pTIO-tetQ-p-porY(S266W)</i> , Ap <sup>r</sup> Em <sup>r</sup> Tc <sup>r</sup> | This study |
|                      |                                                                                                          |            |
| Plasmid              |                                                                                                          |            |
| pBluescript II SK(+) | general cloning vector                                                                                   | Stratagene |
| pFC15A               | Halo tag containing vector                                                                               | Promega    |
| pGEM-T Easy          | general cloning vector                                                                                   | Promega    |
| pUC118               | general cloning vector                                                                                   | Takara     |
| pTCB                 | <i>E. coli-P. gingivalis</i> shuttle plasmid, Ap <sup>r</sup> Tc <sup>r</sup>                            | (49)       |

|                                           |                                                                                                |            |
|-------------------------------------------|------------------------------------------------------------------------------------------------|------------|
| pTIO- <i>tetQ</i>                         | <i>E. coli</i> - <i>P. gingivalis</i> shuttle plasmid, Ap <sup>r</sup> Tc <sup>r</sup>         | (31)       |
| pTIO- <i>tetQ</i> -p- <i>porY</i> [S266W] | pTIO- <i>tetQ</i> - <i>porY</i> promoter- <i>porY</i> [S266W], Ap <sup>r</sup> Tc <sup>r</sup> | This study |
| pKD894                                    | pCR4-PGN_1236up- <i>tetQ</i> -PGN_1236dw, Ap <sup>r</sup> Km <sup>r</sup> Tc <sup>r</sup>      | (33)       |
| pKD1301                                   | pBSSK- <i>porA</i> -upstream and <i>porA</i> -downstream, Ap <sup>r</sup>                      | This study |
| pKD1302                                   | pBSSK- <i>porA</i> -upstream, <i>ermF</i> and <i>porA</i> -downstream, Ap <sup>r</sup>         | This study |
| pKD1303                                   | pBSSK- <i>porA</i> -upstream, <i>cepA</i> and <i>porA</i> -downstream, Ap <sup>r</sup>         | This study |
| pKD1304                                   | pBSSK- <i>cat</i> promoter, Ap <sup>r</sup>                                                    | This study |
| pKD1305                                   | pGEM- <i>porA</i> <sup>+</sup> , Ap <sup>r</sup>                                               | This study |
| pKD1306                                   | pBSSK- <i>cat</i> promoter and <i>porA</i> , Ap <sup>r</sup>                                   | This study |
| pKD1307                                   | pTCB- <i>cat</i> promoter- <i>porA</i> <sup>+</sup> , Ap <sup>r</sup> Tc <sup>r</sup>          | This study |
| pKD1308                                   | pBSSK-PGN_1770-upstream and PGN1770-downstream, Ap <sup>r</sup>                                | This study |
| pKD1309                                   | pBSSK-PGN_0654-upstream and PGN0654-downstream, Ap <sup>r</sup>                                | This study |
| pKD1310                                   | pBSSK-PGN_1770-upstream, <i>ermF</i> and PGN1770-downstream, Ap <sup>r</sup>                   | This study |
| pKD1311                                   | pBSSK-PGN_0654-upstream, <i>ermF</i> and PGN0654-downstream, Ap <sup>r</sup>                   | This study |
| pKD1312                                   | pBSSK- <i>kgp</i> promoter and signal sequence (ss), Ap <sup>r</sup>                           | This study |
| pKD1313                                   | pGEM- <i>halo</i> -tag stop, Ap <sup>r</sup>                                                   | This study |
| pKD1314                                   | pGEM- <i>halo</i> -tag, Ap <sup>r</sup>                                                        | This study |
| pKD1315                                   | pGEM- <i>porA</i> CTD84, Ap <sup>r</sup>                                                       | This study |
| pKD1316                                   | pGEM- <i>rgpB</i> CTD73, Ap <sup>r</sup>                                                       | This study |
| pKD1317                                   | pGEM- <i>pad</i> CTD84, Ap <sup>r</sup>                                                        | This study |
| pKD1318                                   | pGEM- <i>mfa5</i> CTD84, Ap <sup>r</sup>                                                       | This study |
| pKD1319                                   | pGEM- <i>hbp35</i> CTD67, Ap <sup>r</sup>                                                      | This study |
| pKD1320                                   | pGEM- <i>kgp</i> CTD72, Ap <sup>r</sup>                                                        | This study |
| pKD1321                                   | pGEM- <i>halo</i> and <i>porA</i> CTD84, Ap <sup>r</sup>                                       | This study |
| pKD1322                                   | pGEM- <i>halo</i> and <i>rgpB</i> CTD73, Ap <sup>r</sup>                                       | This study |
| pKD1323                                   | pGEM- <i>halo</i> and <i>pad</i> CTD84, Ap <sup>r</sup>                                        | This study |

|         |                                                                                        |            |
|---------|----------------------------------------------------------------------------------------|------------|
| pKD1324 | pGEM- <i>halo</i> and <i>mfa5</i> CTD84, Ap <sup>r</sup>                               | This study |
| pKD1325 | pGEM- <i>halo</i> and <i>hbp35</i> CTD67, Ap <sup>r</sup>                              | This study |
| pKD1326 | pGEM- <i>halo</i> and <i>kgp</i> CTD72, Ap <sup>r</sup>                                | This study |
| pKD1327 | pBSSK- <i>kgp</i> promoter-ss and <i>halo</i> and <i>porA</i> CTD84, Ap <sup>r</sup>   | This study |
| pKD1328 | pBSSK- <i>kgp</i> promoter-ss and <i>halo</i> and <i>rgpB</i> CTD73, Ap <sup>r</sup>   | This study |
| pKD1329 | pBSSK- <i>kgp</i> promoter-ss and <i>halo</i> and <i>pad</i> CTD84, Ap <sup>r</sup>    | This study |
| pKD1330 | pBSSK- <i>kgp</i> promoter-ss and <i>halo</i> and <i>mfa5</i> CTD84, Ap <sup>r</sup>   | This study |
| pKD1331 | pBSSK- <i>kgp</i> promoter-ss and <i>halo</i> and <i>hbp35</i> CTD67, Ap <sup>r</sup>  | This study |
| pKD1332 | pBSSK- <i>kgp</i> promoter-ss and <i>halo</i> and <i>kgp</i> CTD72, Ap <sup>r</sup>    | This study |
| pKD1333 | pBSSK- <i>kgp</i> promoter-ss and <i>halo</i> stop, Ap <sup>r</sup>                    | This study |
| pKD1334 | pTCB- <i>kgp</i> promoter-ss- <i>halo-porA</i> CTD84, Ap <sup>r</sup> Tc <sup>r</sup>  | This study |
| pKD1335 | pTCB- <i>kgp</i> promoter-ss- <i>halo-rgpB</i> CTD73, Ap <sup>r</sup> Tc <sup>r</sup>  | This study |
| pKD1336 | pTCB- <i>kgp</i> promoter-ss- <i>halo-pad</i> CTD84, Ap <sup>r</sup> Tc <sup>r</sup>   | This study |
| pKD1337 | pTCB- <i>kgp</i> promoter-ss- <i>halo-mfa5</i> CTD84, Ap <sup>r</sup> Tc <sup>r</sup>  | This study |
| pKD1338 | pTCB- <i>kgp</i> promoter-ss- <i>halo-hbp35</i> CTD67, Ap <sup>r</sup> Tc <sup>r</sup> | This study |
| pKD1339 | pTCB- <i>kgp</i> promoter-ss- <i>halo-kgp</i> CTD72, Ap <sup>r</sup> Tc <sup>r</sup>   | This study |
| pKD1340 | pTCB- <i>kgp</i> promoter-ss- <i>halo</i> stop, Ap <sup>r</sup> Tc <sup>r</sup>        | This study |

**Supplemental Table S2. Primers used in this study.**

| Primer                                                 | Sequence                                 | Description                 |
|--------------------------------------------------------|------------------------------------------|-----------------------------|
| Expression of recombinant proteins for antiserum       |                                          |                             |
| porA-15bF                                              | <u>catatg</u> aaaaaaacaaaaagaaatgagg     | NdeI- <i>porA</i> (N0123)   |
| porA-15bR                                              | <u>agatc</u> ttacttaatcagatacttctgaac    | BglIII- <i>porA</i> (N0123) |
| porL-15bF                                              | <u>catatgggtc</u> attatagaagatacaagaac   | NdeI- <i>porL</i> (N1675)   |
| porL-15bR                                              | <u>ggatcc</u> ttataagggtgagctgccggatga   | BamHI- <i>porL</i> (N1675)  |
| porM-22bF                                              | <u>ggatcc</u> atggcagtaggttctaattgggaat  | BamHI- <i>porM</i> (N1674)  |
| porM-22bR                                              | <u>ctcgagg</u> ttcacaattacttcaatggccggaa | XhoI- <i>porM</i> (N1674)   |
| porN-22bF                                              | <u>gtcgacg</u> aaaatacgaacaaccgctctccg   | Sall- <i>porN</i> (N1673)   |
| porN-22bR                                              | <u>ctcgagc</u> ttgcggcgacgaaccgagcgagt   | XhoI- <i>porN</i> (N1673)   |
| porV-32bF                                              | <u>gatatc</u> tactagtaatgcggagagcttg     | EcoRV- <i>porV</i> (N0023)  |
| porV-32bR                                              | <u>ctcgagg</u> tgaacaaattgcgcaatccatc    | XhoI- <i>porV</i> (N0023)   |
| sigP-15bF                                              | <u>catatg</u> agcagttccacaagctgactgat    | NdeI- <i>sigP</i>           |
| sigP-15bR                                              | <u>ggatcc</u> ctaagccgacatgcccatcattt    | BamHI- <i>sigP</i>          |
| Expression of recombinant proteins for crystallization |                                          |                             |
| porA-15b28F                                            | <u>catatg</u> caagttgtgatcaaggtgggagat   | NdeI- <i>porA</i> (N0123)   |
| Mutation                                               |                                          |                             |
| N0123-U-F                                              | <u>ggtacct</u> gtcggatacatgccggccctgc    | KpnI-N0123-U                |
| N0123-U-R                                              | <u>agatc</u> ttatttgccatcggattgcggattg   | BglIII-N0123-U              |
| N0123-D-F                                              | <u>agatc</u> taatgggagtagcggccaaagcctg   | BglIII-N0123-D              |
| N0123-D-R                                              | <u>gcgccg</u> caaaagcctgtcccattccgca     | NotI-N0123-D                |
| N1770-U-F                                              | <u>ggtacc</u> acccttttggatagatagcatcg    | KpnI-N1770-U                |
| N1770-U-R                                              | <u>ggatcc</u> aagagcagcaccaataagtaatgc   | BamHI-N1770-U               |
| N1770-D-F                                              | <u>ggatcc</u> gagtaattgtatacctgatag      | BamHI-N1770-D               |
| N1770-D-R                                              | ctcccgtacagaagccaaggccttgatcg            | (NotI)-N1770-D              |
| N0654-U-F                                              | <u>ggtacc</u> gtagctgatataaagaagcaccc    | KpnI-N0654-U                |
| N0654-U-R                                              | <u>ggatcc</u> ttgtcttcaatgattttagttg     | BglIII-N0654-U              |
| N0654-D-F                                              | <u>ggatcc</u> cgatgaaacgaataattttattgc   | BglIII-N0654-D              |
| N0654-D-R                                              | cattgtaggttggtatgttgaagtcac              | (NotI)-N0654-D              |
| N1019-U-F3                                             | ttcctattgatggaacatcaca                   | N1019-U-941                 |
| N1019-D-R2                                             | tatgatgacgattttactgcaa                   | N1019-D-685                 |
| PGN1676-U-F-NotI                                       | gcgcccggtgaactgaccggtccaage              | NotI-N1676-U                |
| PGN1676-D-R-KpnI                                       | ggtaccgtgagcgcagctttgtattccagt           | KpnI-N1676-D                |
| PGN2001-U-F-650                                        | caatgtgtgggatttcgtgct                    | N2001-U                     |

|                  |                               |                                            |
|------------------|-------------------------------|--------------------------------------------|
| PGN2001-D-R-502  | gttcctctgcggtaaaccggctcca     | N2001-R                                    |
| Complementation  |                               |                                            |
| PRO-U            | ggtacccttcgctgcaatcagcatcccag | KpnI-cat pro-F                             |
| PRO-R-B          | ggatcctgtttgtctcttatttaagta   | BamHI-cat pro-R                            |
| N0123-coF-B      | agatctatgaaaaaaaaaaaaagaatatg | BglIII-N0123-F                             |
| N0123-coR-(NotI) | gggaaaaccactttgtgacgagcggtaac | N0123-D                                    |
| qRT-PCR          |                               |                                            |
| REALpgn0274F     | gagccaggttcagctcttc           | used for Fig. 2C, 2E                       |
| REALpgn0274R     | gctcatgtcctcccagtagc          | used for Fig. 2C, 2E                       |
| REALpgn1019F     | gatcggggacagaagtacca          | used for Fig. 2C, 2E, Supplemental Fig. S3 |
| REALpgn1019R     | attcgggtaggcgaagaagt          | used for Fig. 2C, 2E, Supplemental Fig. S3 |
| REALpgn0778F3    | tctcggatgcgattttacc           | used for Fig. 2E                           |
| REALpgn0778R3    | ctcgaaattgaacgtgagca          | used for Fig. 2E                           |
| REALpgn1676F1    | gtccgcttagcagcgaatac          | used for Fig. 2C, 2E                       |
| REALpgn1676R1    | gatctgtccttcaggcaagc          | used for Fig. 2C, 2E                       |
| REALpgn1675F1    | cgtcgcagcacaagaata            | used for Fig. 2C                           |
| REALpgn1675R1    | aaagcatctcattgcccatc          | used for Fig. 2C                           |
| REALpgn1674F1    | agtaggcagcgaagccatta          | used for Fig. 2C                           |
| REALpgn1674R1    | atttcacgcttaccacaacg          | used for Fig. 2C                           |
| REALpgn1673F2    | tcgctcgtgaacgagtaag           | used for Fig. 2C                           |
| REALpgn1673R2    | gaatcgggcgtaggacagta          | used for Fig. 2C                           |
| REALpgn0022F1    | catggagaggaaatccctga          | used for Fig. 2C                           |
| REALpgn0022R1    | catttgcatcgggaaagtct          | used for Fig. 2C                           |
| REALpgn0023F1    | ctctgtgccatcgtgaata           | used for Fig. 2C, Supplemental Fig. S10A   |
| REALpgn0023R1    | cttgacagccagggtgat            | used for Fig. 2C, Supplemental Fig. S10A   |
| REALpgn1534F1    | aggattccatctgcccttt           | used for Fig. 2C                           |
| REALpgn1534R1    | gaacgctcgcctttgactac          | used for Fig. 2C                           |
| REALpgn1351F1    | ccgcagaaaatcagaccatt          | used for Fig. 2C                           |
| REALpgn1351R1    | ctccgcttccatcgatac            | used for Fig. 2C                           |
| REALpgn0123F1    | ttgctttgtctttggtcag           | used for Fig. 2C, 2E                       |
| REALpgn0123R1    | cccagcccgatattagtaa           | used for Fig. 2C, 2E                       |
| REALpgn1676F3    | agctcaatccggatcaaatg          | used for Supplemental Fig. S10A            |
| REALpgn1676R3    | gatgatattgcccttctgt           | used for Supplemental Fig. S10A            |
| REALpgn1675F2    | aaaccgcaatggaatatca           | used for Supplemental Fig. S10A            |
| REALpgn1675R2    | tctgcttccggcagatt             | used for Supplemental Fig. S10A            |

|                     |                                          |                                                   |
|---------------------|------------------------------------------|---------------------------------------------------|
| REALpgn1674F3       | ctcctgaccaagctccaag                      | used for Supplemental Fig. S10A                   |
| REALpgn1674R3       | catgttctcgggagaaagga                     | used for Supplemental Fig. S10A                   |
| REALpgn0778F2       | ttgtaccggaaggagtagc                      | used for Supplemental Fig. S10A                   |
| REALpgn0778R2       | tggatcgaacggagaaagag                     | used for Supplemental Fig. S10A                   |
| REALpgn0832F1       | cgcaagaactaagcggaatc                     | used for Supplemental Fig. S10A                   |
| REALpgn0832R1       | ctgataaacctgccctgtgt                     | used for Supplemental Fig. S10A                   |
| REALpgn2001F1       | aattgaggatgccgaatgag                     | used for Supplemental Fig. S4B                    |
| REALpgn2001R1       | ctgcatacagaccctttctcc                    | used for Supplemental Fig. S4B                    |
| pg16SrF1            | gttgacttcagtggcggca                      | used for Fig. 2C, 2E, Supplemental Fig. S4B, S10A |
| pg16SrR1            | agggaagacggtttcacca                      | used for Fig. 2C, 2E, Supplemental Fig. S4B, S10A |
| Halo-CTD fusion     |                                          |                                                   |
| kpg-U400-KpnI       | <u>ggtaccactttaagtggttagacaacac</u>      | KpnI-kpg-U                                        |
| kpg-sigR-SalI       | <u>gtcgacggcgtaaaagaccaactcccaaaag</u>   | SalI-Kgp signal seq 19 aa                         |
| halo-F-SalI         | <u>gtcgacatggcagaaatcggtactggctt</u>     | SalI-HaloTag ORF-F                                |
| halo-stopR-BglII    | <u>agatctttaaccggaatctccagagtaga</u>     | BglII-HaloTag ORF-stop-R                          |
| halo-R-BglII        | <u>agatctaccggaatctccagagtagaaag</u>     | BglII-HaloTag ORF-R                               |
| rgpB-CTD73-F-BglII  | <u>agatcttctattgccgactagccaatgat</u>     | BglII-RgpB CTD (1990-2013)                        |
| rgpB-CTD-R-NotI     | <u>gcggccgcttacttcaataaccttttc</u>       | NotI-RgpB CTD (2211-2190)                         |
| porA-CTD84-F-BglII  | <u>agatctgattgactaataatcgggctggggcgt</u> | BglII-PorA CTD (487-510)                          |
| porA-CTD-R-NotI     | <u>gcggccgcttacttaacagataacttctga</u>    | NotI-PorA CTD (741-720)                           |
| ppad-CTD84-F-BglII  | <u>agatctggagctccaagctcttcgtgcatgg</u>   | BglII-Pad CTD (1417-1440)                         |
| ppad-CTD-R-NotI     | <u>gcggccgcttattgagaatttcattgtc</u>      | NotI-Pad CTD (1671-1650)                          |
| kpg-CTD72-F-BglII   | <u>agatctggagtgacagacgtaactgctcagaag</u> | BglII-Kgp CTD (4954-4977)                         |
| kpg-CTD-R-NotI      | <u>gcggccgcttacttgatagcagtttctct</u>     | NotI-Kgp CTD (5172-5151)                          |
| hbp35-CTD67-F-BglII | <u>agatctgctacagaacaattgttctacc</u>      | BglII-Hbp35 CTD (832-855)                         |
| hbp35-CTD-R-NotI    | <u>gcggccgctcaaggaactaagactttaagg</u>    | NotI-Hbp35 CTD (1035-1012)                        |
| mfa5-CTD84-F-BglII  | <u>agatcttatgacgaagagtggggtgaatcgca</u>  | BglII-Mfa5 CTD (3433-3456)                        |
| mfa5-CTD-R-NotI     | <u>gcggccgcttagtgactacaacttctct</u>      | NotI-Mfa5 CTD (3687-3665)                         |

**Supplemental Table S3. X-ray data collection and refinement statistics.**

---

| Crystal                            | Native              | SeMet-derivative      |
|------------------------------------|---------------------|-----------------------|
| Space group                        | <i>C</i> 2          | <i>C</i> 2            |
| Cell dimensions                    |                     |                       |
| <i>a</i> , <i>b</i> , <i>c</i> (Å) | 67.3, 43.2, 48.6    | 67.6, 43.3, 48.8      |
| <i>α</i> , <i>β</i> , <i>γ</i> (°) | 90.0, 108.5, 90.0   | 90.0, 108.7, 90.0     |
| Wavelength                         | 1.00                | 0.979                 |
| Resolution                         | 46.1-1.3 (1.32-1.3) | 35.9-1.35 (1.37-1.35) |
| <i>R</i> <sub>merge</sub>          | 0.038 (0.329)       | 0.049 (0.648)         |
| <i>I</i> / <i>σ</i> <i>I</i>       | 17.9 (3.9)          | 13.4 (2.1)            |
| Completeness (%)                   | 95.5 (95.6)         | 96.9 (96.6)           |
| Redundancy                         | 3.8 (3.9)           | 4.8 (4.8)             |

---

---

|                            |          |             |
|----------------------------|----------|-------------|
| Resolution range (Å)       | 46.1-1.3 | (1.34-1.30) |
| No. of reflections working | 29,538   | (2,683)     |
| No. of reflections test    | 1,590    | (145)       |
| <i>R</i> <sub>w</sub> (%)  | 18.1     | (22.6)      |

|                               |        |        |
|-------------------------------|--------|--------|
| $R_{free}$ (%)                | 20.3   | (25.9) |
| Rms deviation bond length (Å) | 0.009  |        |
| Rms deviation Bond angle (°)  | 1.057  |        |
| B-factors                     |        |        |
| Protein atoms                 | 18.8   |        |
| Solvent atoms                 | 29.3   |        |
| Ramachandran plot (%)         |        |        |
| Most favored                  | 99.2   |        |
| Allowed                       | 0.8    |        |
| Disallowed                    | 0      |        |
| No. of protein atoms          | 1, 004 |        |

---

|                      |     |
|----------------------|-----|
| No. of solvent atoms | 145 |
|----------------------|-----|

Values in parentheses are for the highest resolution shell.

$$R_w = \frac{\sum || F_o | - | F_c ||}{\sum | F_o |}, R_{free} = \frac{\sum || F_o | - | F_c ||}{\sum | F_o |}$$



Fig. S1

A

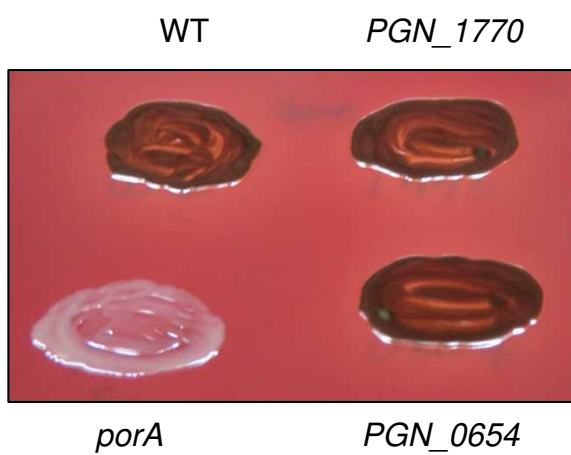

B

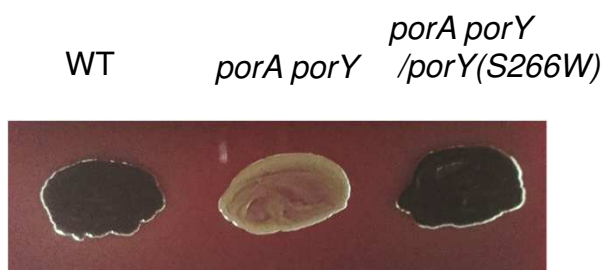

Fig. S2

A

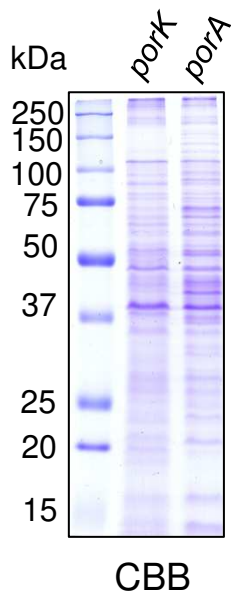

B

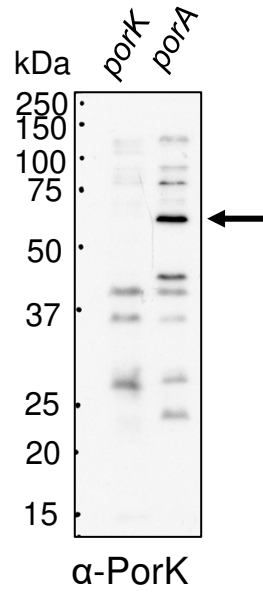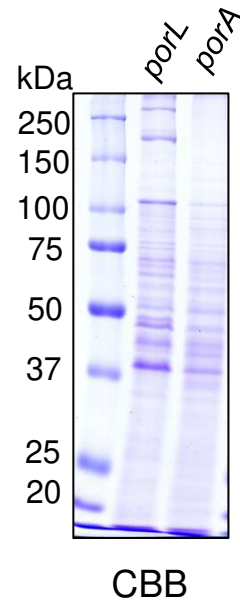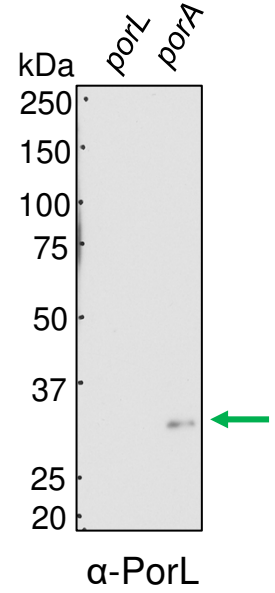

C

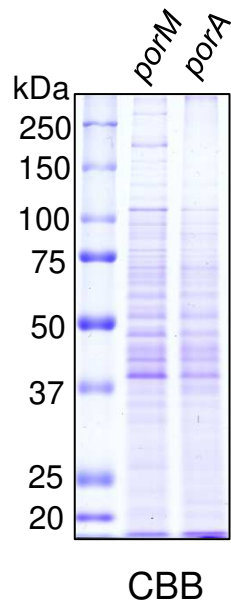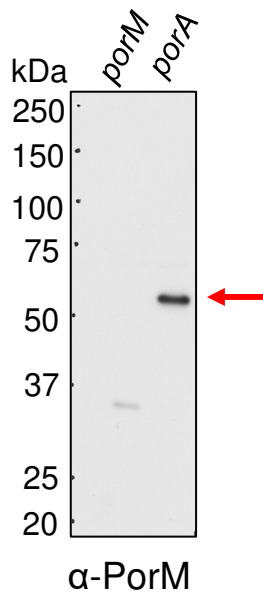

Fig. S3

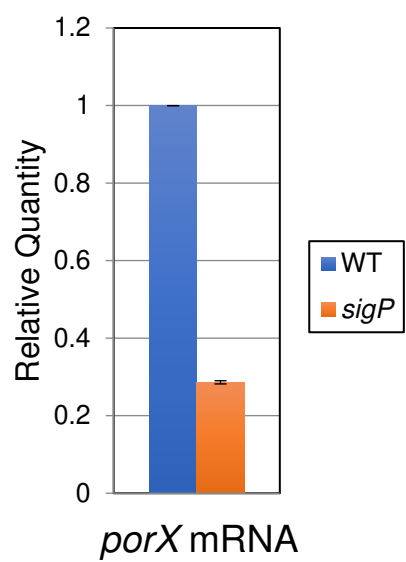

Fig. S4

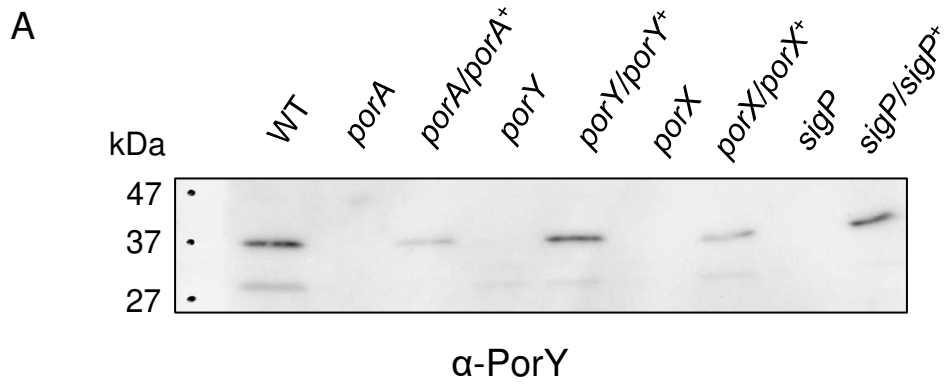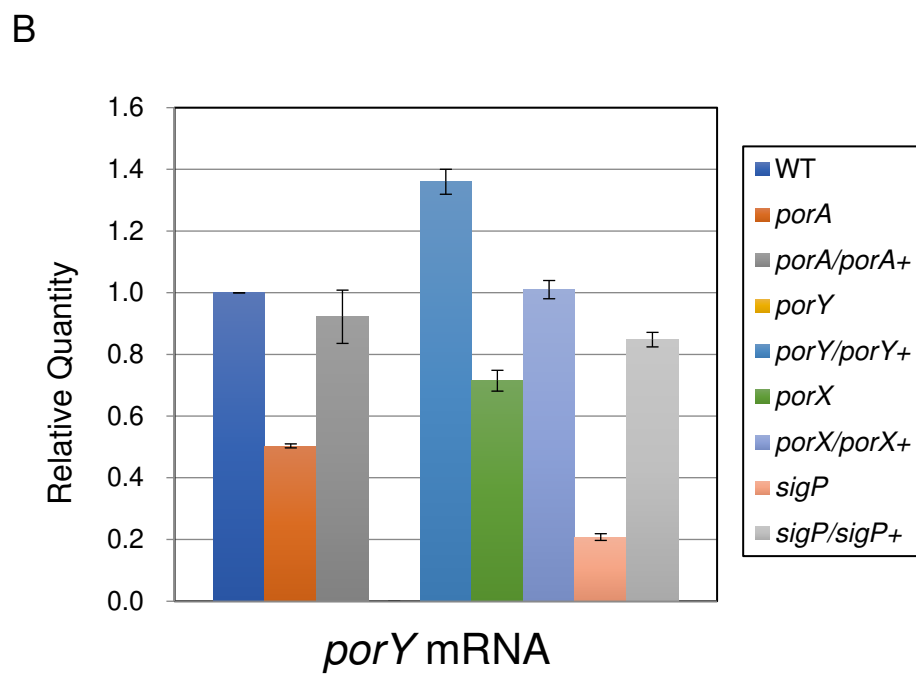

Fig. S5

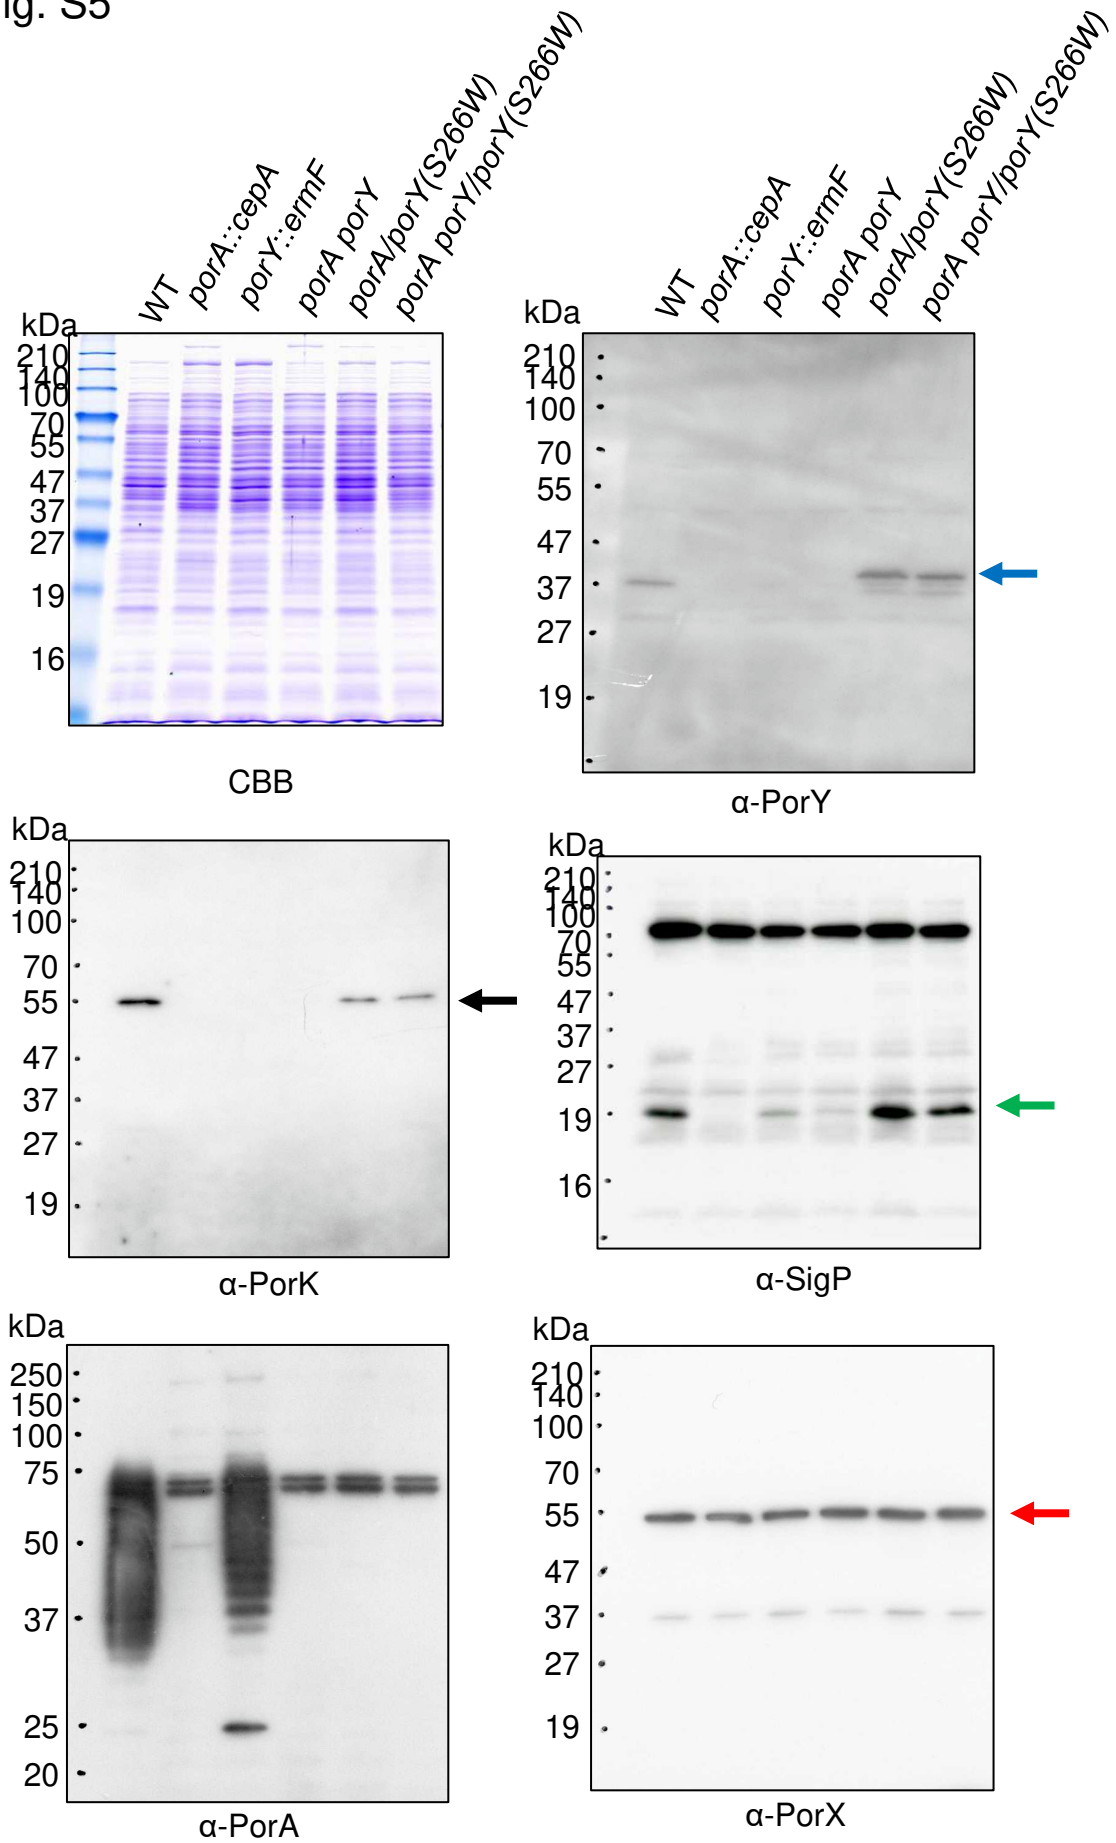

Fig. S6

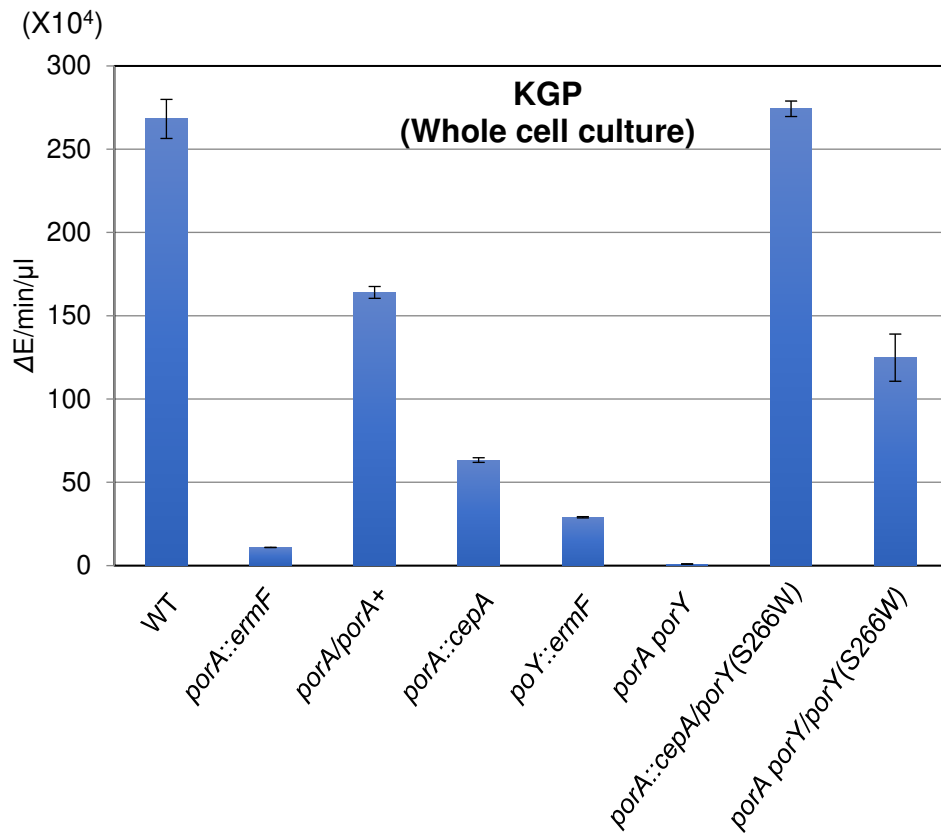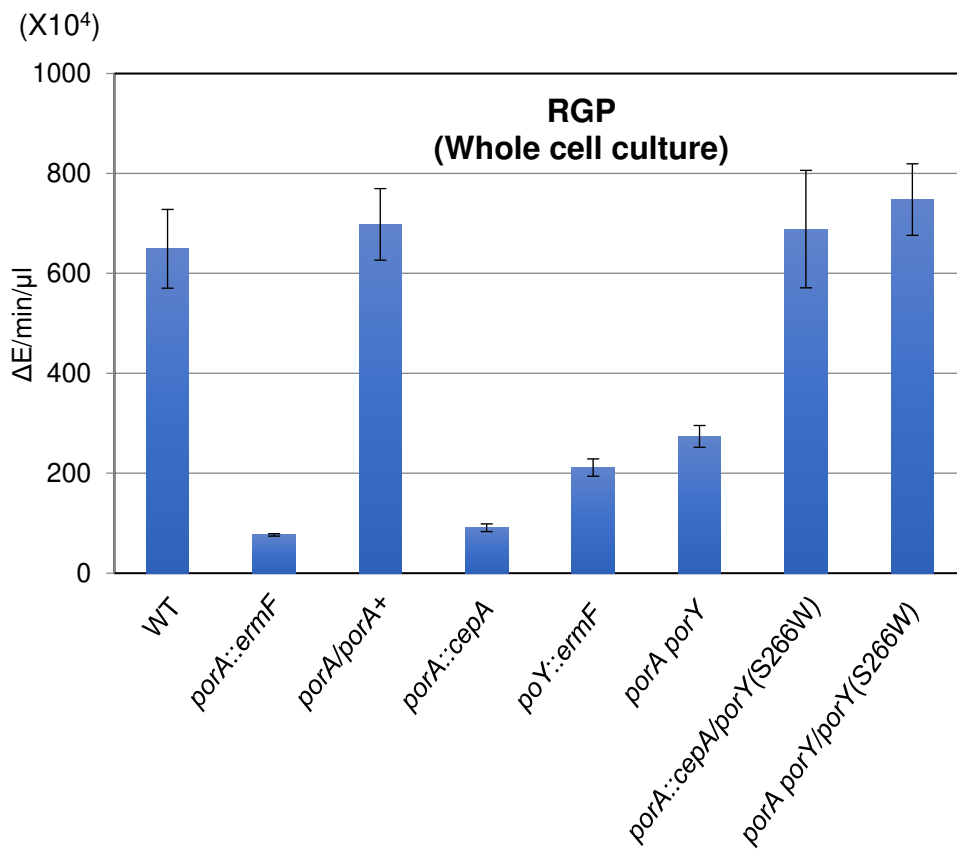

Fig. S7

A

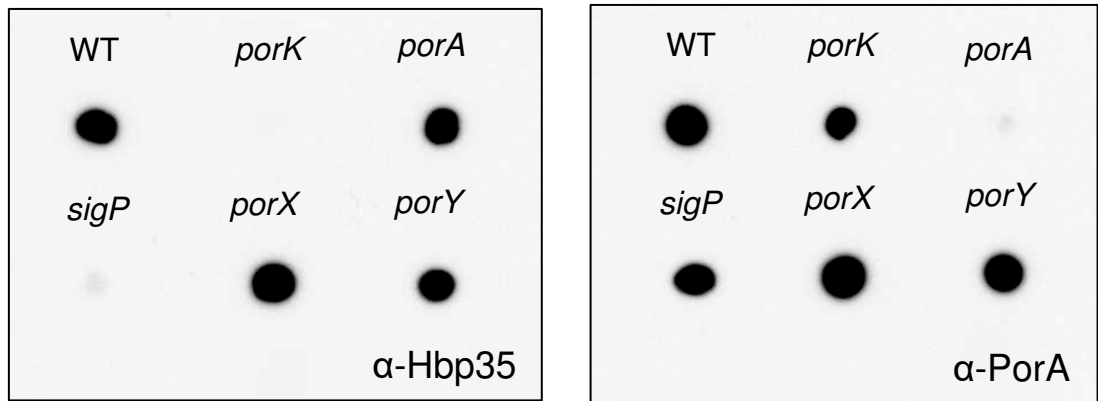

B

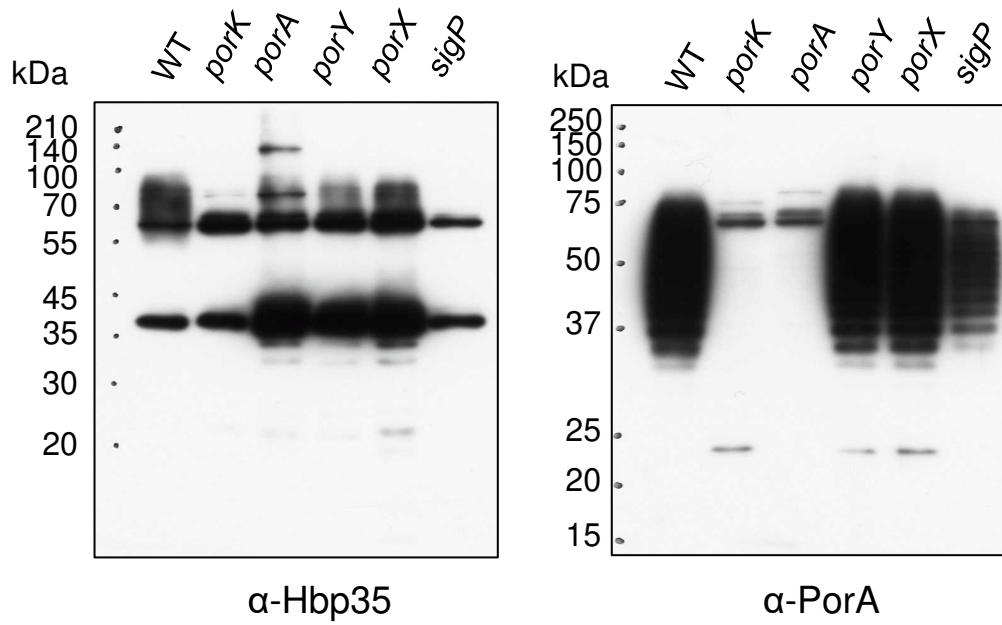

Fig. S8

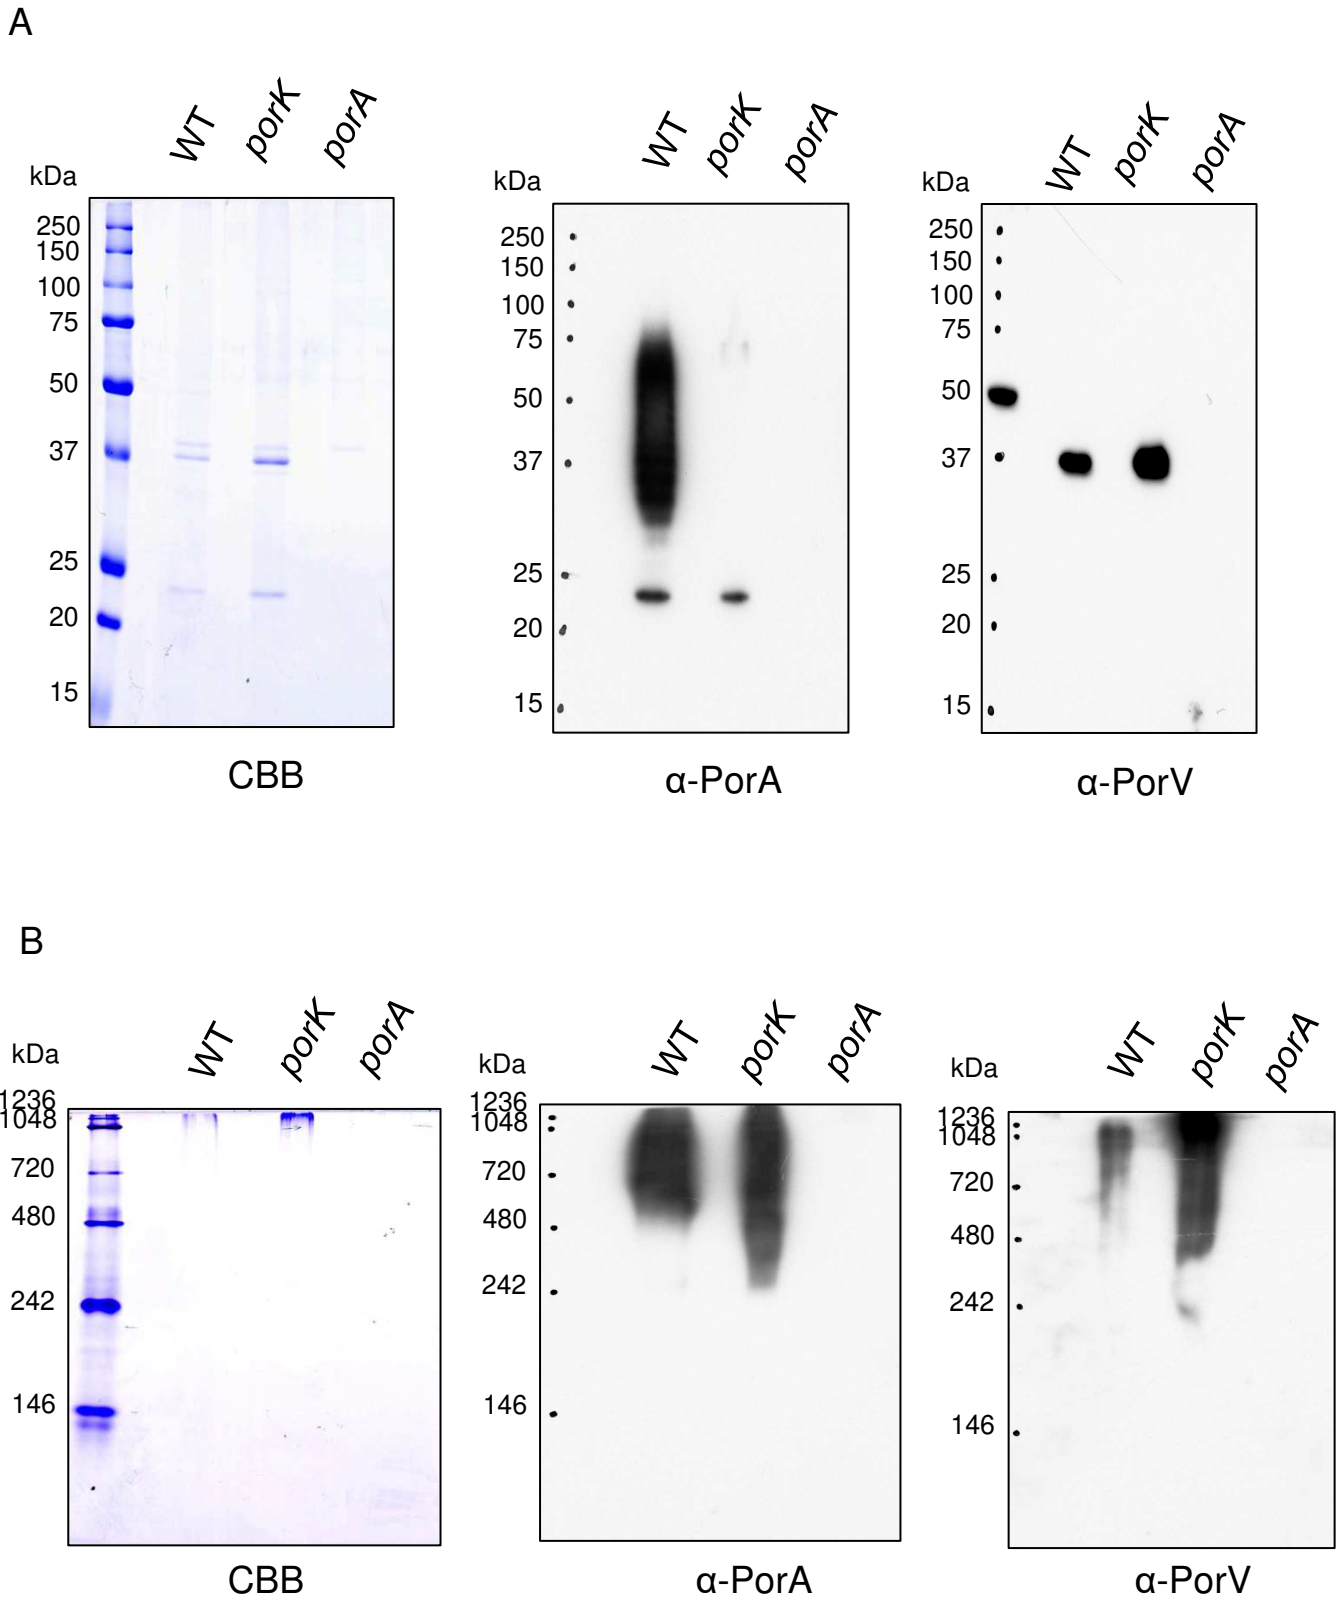



Fig. S9

A

```

RgpB  SIADVANDKPYTVAVS--GKTITVES----PAAGLTIFDMNGRRVATAK-----NRMVFEEAQ---NGVYAVRIATEGK-TYTEKVIVK
Kgp   GVADVTAQKPYTLTVV--GKTITVTC----QGEAM-IYDMNGRRLAAGR-----NTVVYTAQ---GGYAVMVVVDGK-SYVEKLAIK
Hbp35 ATEQIVATPSVKAYVQ--NGKIVVEE----EYSKMEVFNATG-QLVKNE-----SLVP-----GVYVVRITANGV-MHFLKVLVP
PorA  DLTNIGLGR-IALIQS--GNTCTLQYNSNGKRLALEVYNLLGVKVF TSQLPAGSGSY TLPVRLQ---RGVHIFRI TEGGKPAFVQKYLK
PPAD  -GAAKALRAWFNAGRS--ELAVSVSLN-IAGTYRIKLYNTAGEEVAAMTKELVAGTSVF SMDVYSQAPGT YVVLVVEGNGI-RETMKILK
Mfa5  YDEEWVESAEVSVLVGTVGKRILITNN-CEHACQANVYTTDGKLLIRLDVK--PGSKSMTEPLI---DGAYVVSLSQSPATSSNVRKVVVN
      :                :: * :                .                * : . : .                *
    
```

B

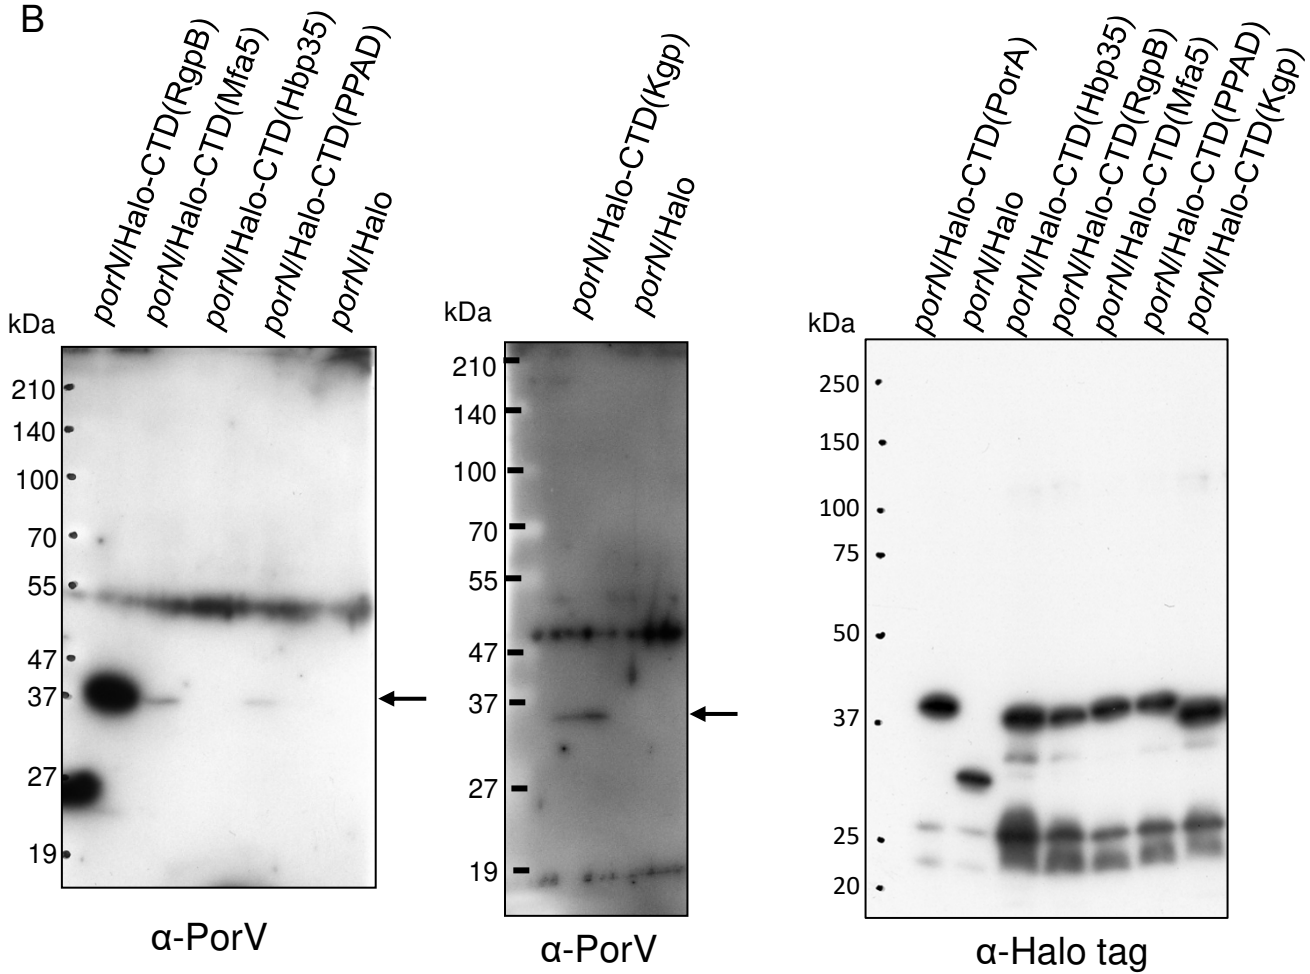

Fig. S10

A

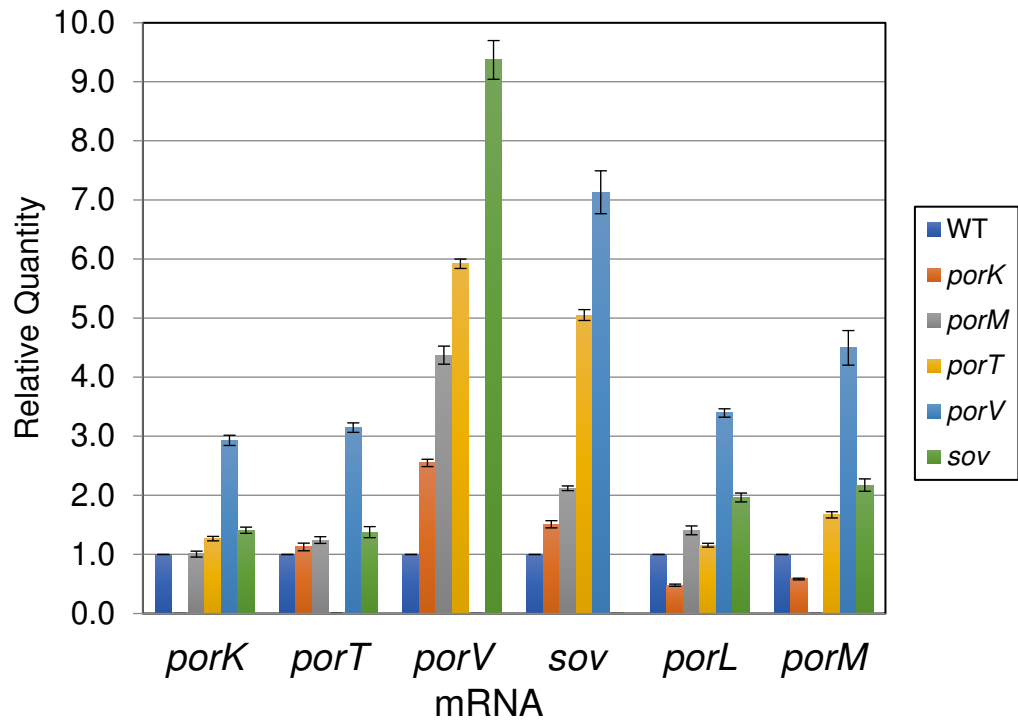

B

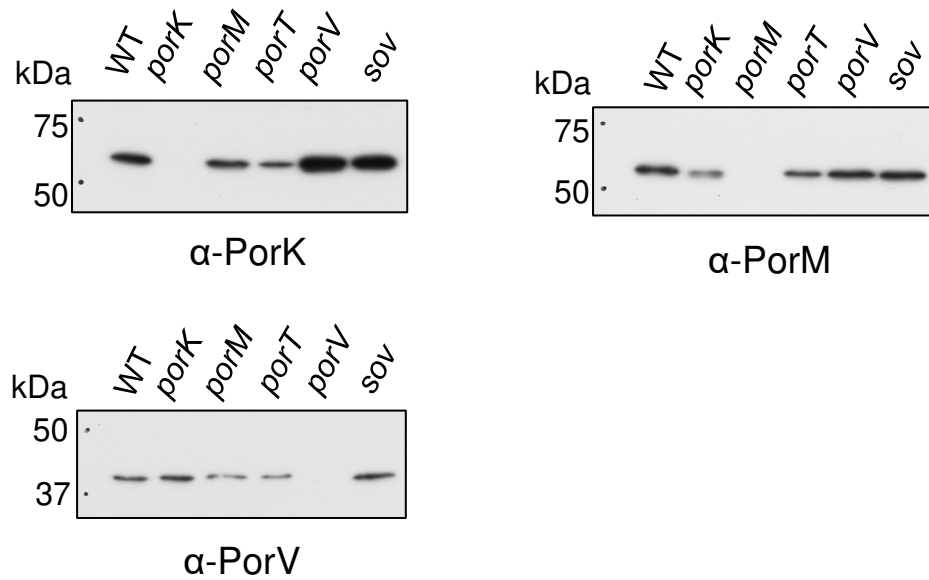

Fig. S11

E

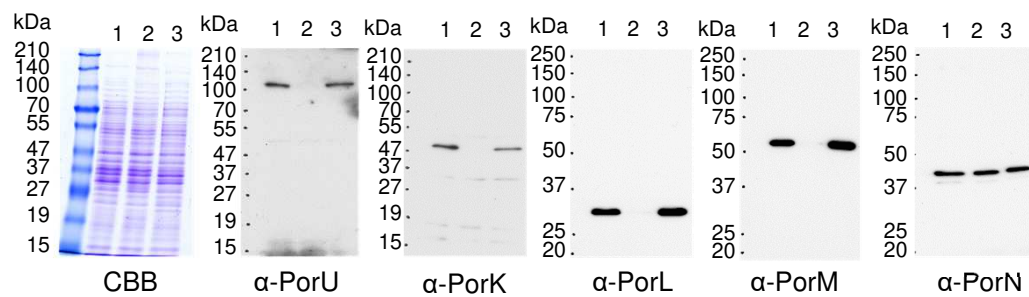

F

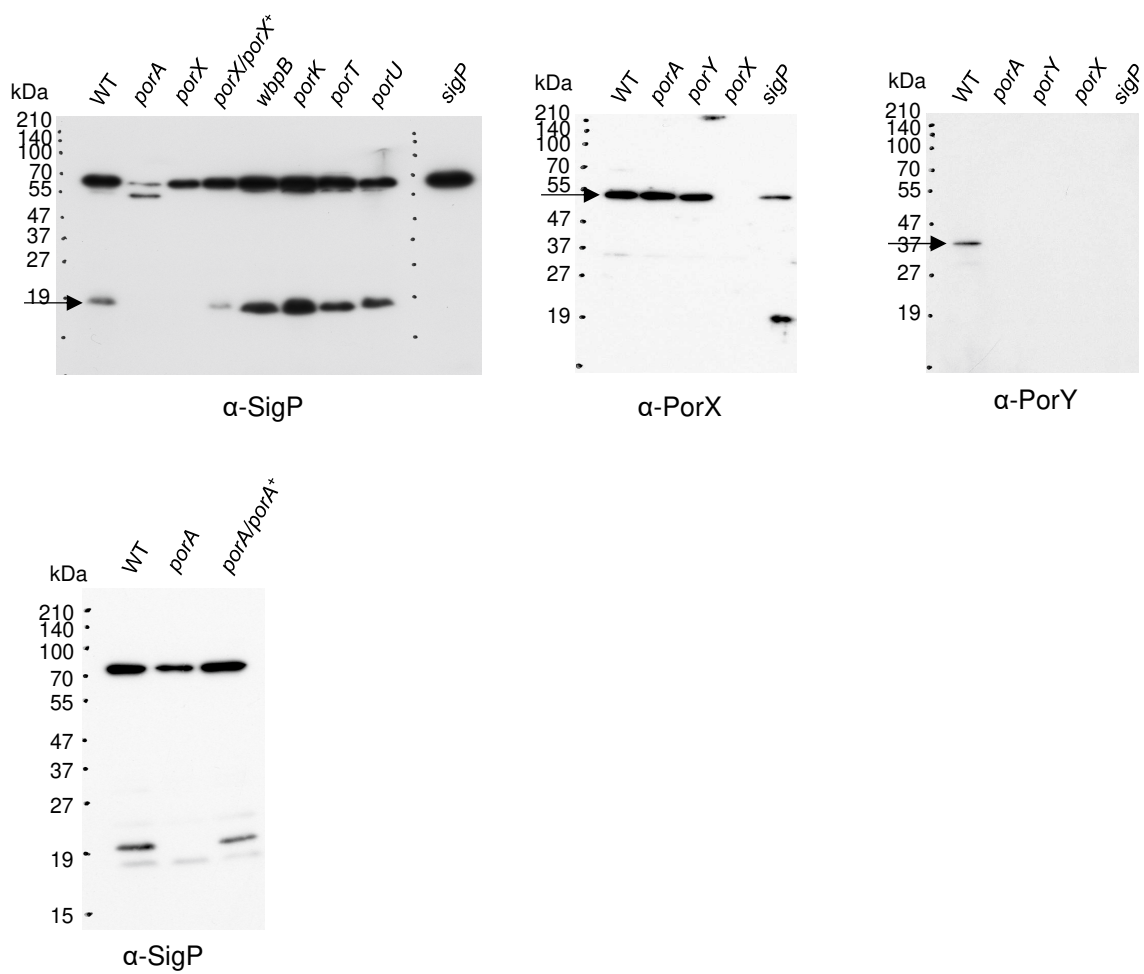

Fig. S12

A

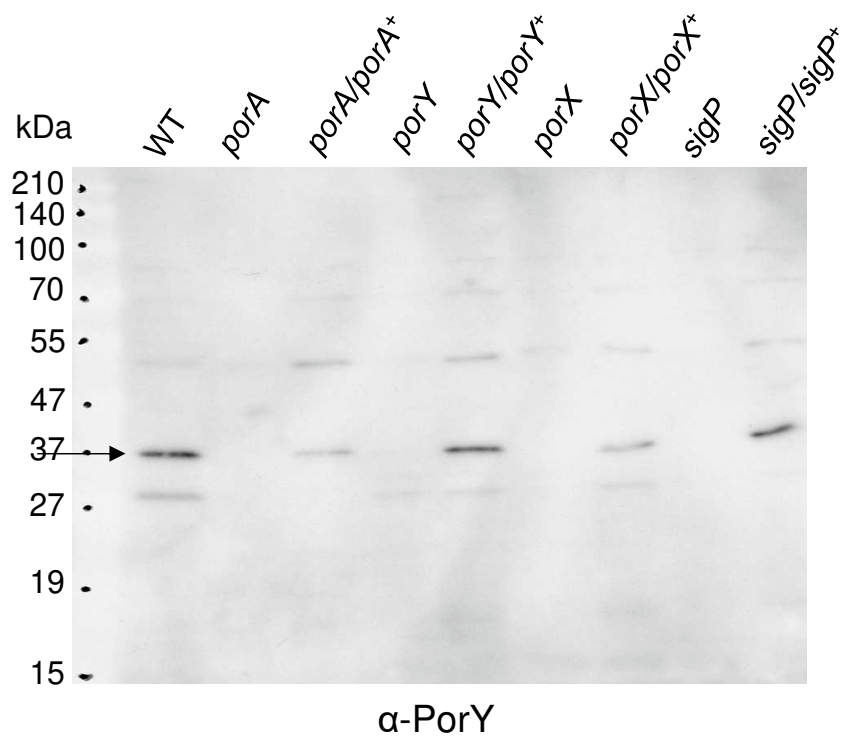

Fig. S13

B

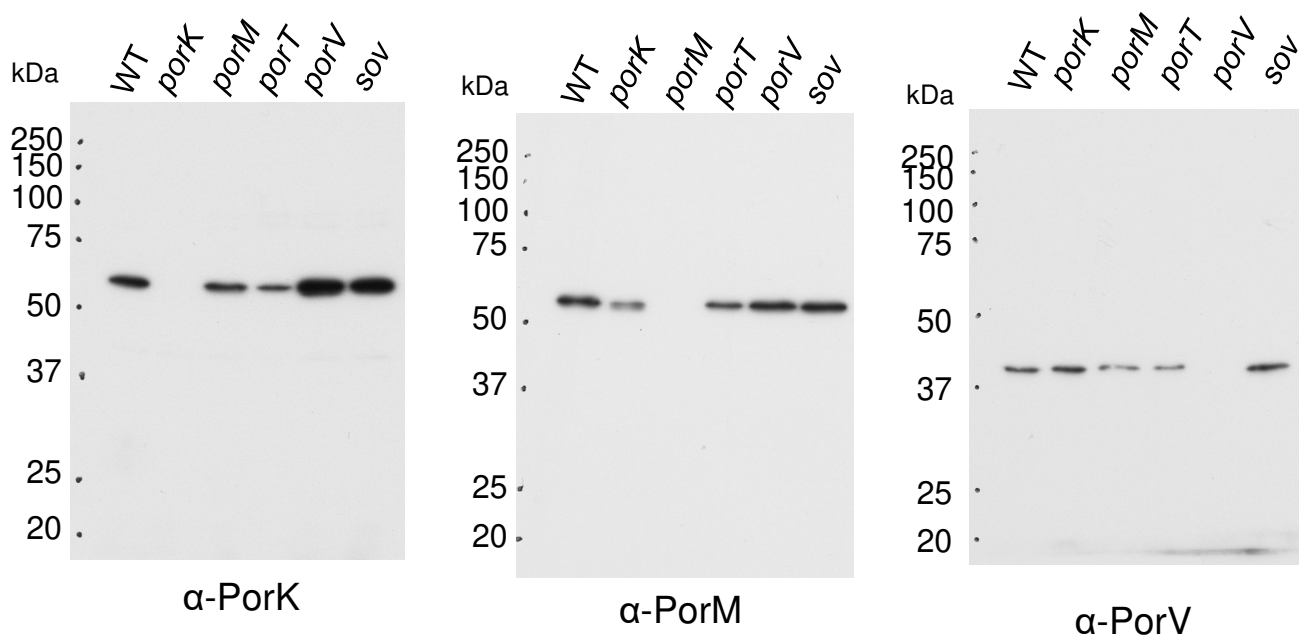

Supplement: 41598_2020_77987_MOESM1_ESM.pdf [file 41598_2020_77987_MOESM1_ESM.pdf]
